# Supplementary material for: Scaling of cytoskeletal organization with cell size in Drosophila
Source: PubMed Central journal article supplement — Mol Biol Cell. 2017 Jun 1;28(11):1519–29. doi: 10.1091/mbc.E16-10-0691 (PMC5449150; doi:10.1091/mbc.e16-10-0691), 2017-06-01
Supplement: supp_E16-10-0691v1_SpencerSupplement.pdf [file supp_E16-10-0691v1_SpencerSupplement.pdf]

# Supplemental Materials

*Molecular Biology of the Cell*

Spencer et al.

## Supplemental Figure Legends

**Figure S1. Denticle organization in wild-type and mutant embryos.** (A) Denticle and cell edge markers in stage 15-16 *Drosophila* embryos are delineated by the user and several features of the denticle distribution are calculated automatically. (B-D) Cell length along the dorsal-ventral axis (B), number of denticles/cell (C), and denticle spacing (D) plotted by denticle column in wild-type (WT) embryos. Boxes, 25<sup>th</sup>-75<sup>th</sup> percentile; whiskers, 1.5 inter-quartile range (IQR); horizontal line, median; +, mean. (B)  $p < 0.01$  for all comparisons except column 1 vs. column 2, (C)  $p < 0.0001$  for all comparisons except column 2 vs. column 4, (D)  $p < 0.001$  for all comparisons except columns 3 vs. 4, 3 vs. 5, and 4 vs. 5, Kruskal-Wallis test with Dunn's multiple comparison test. (E) Distribution of cells with 1 to 5 denticles in WT embryos. (F) Denticle spacing for WT cells with 2 to 6 denticles.  $p < 0.01$  for all comparisons except cells with 4 vs. 5 denticles and 5 vs. 6 denticles. (G) Denticle spacing in longer cells ( $4.2 \pm 1.0 \mu\text{m}$  mean $\pm$ SD, red) was larger than denticle spacing in shorter cells ( $3.1 \pm 0.7 \mu\text{m}$ , black) ( $p < 0.0001$ , Student's t-test). Data for cells with 2 denticles. (H) Cell length vs. denticle spacing and best-fit linear regression lines for cells with 2 denticles in WT embryos (gray) and Monte Carlo simulations (orange). (I,J) The placement of the outermost denticles relative to the dorsal and ventral boundaries of the cell in WT embryos. (I) Absolute distance of the dorsal-most denticle from the dorsal cell edge (x-axis), absolute distance of the ventral-most denticle from the ventral cell edge (y-axis). (J) Data as in I, but normalized to cell length.  $n = 153$  cells with 1 denticle (red), 94 cells with 2 denticles (orange), and 20 cells with 3 denticles (green). (K,L) Cell length vs. denticle number in WT embryos (K) and larvae (L) (mean $\pm$ SD). Panel L shows the same data as in Figure 4C, but as mean $\pm$ SD and with the axes reversed for easier comparison with panel K. (M,N) The error relative to cell length (M) or relative to the spacing distance predicted by the statistical model (N). In both cases, the relative error was decreased for cells with 2, 3, or 4 denticles in larvae compared to embryos ( $p < 0.0001$ , Kruskal-Wallis test with Dunn's multiple comparison test).

**Figure S2. Analysis of denticle spacing in multiple genetic backgrounds.** (A) Denticle spacing vs. cell length for cells with 2 to 14 denticles in wild-type (WT) embryos (gray dots) and first instar larvae (colored dots). Solid lines, best-fit linear regressions.

(B,C) Denticle spacing vs. cell length for cells with 2 or 3 denticles in WT (gray dots) and *ms(3)k81* (colored dots in B) or CycE-OE embryos (colored dots in C). Solid lines, best-fit linear regressions. (D,E) Denticle spacing vs. cell length for cells with 2 to 5 denticles in column 1 cells of WT (gray dots) and Spastin-OE (colored dots in D) or Patronin-KD (colored dots in E). Solid lines, best-fit linear regressions. (F,G) Residuals for the best-fit linear regressions for WT embryos (F) and larvae (G). Colors as in A. (H) Residuals for the best-fit linear regressions for WT embryos (gray) and Monte Carlo simulations (orange) for cells with 2 denticles.

**Figure S3. Comparison of denticle spacing simulations with *in vivo***

**measurements.** (A-G) Percentage of simulations that are consistent with ( $p \geq 0.05$ , yellow) or significantly different from ( $p < 0.05$ , blue) the *in vivo* distributions for each  $\alpha$ ,  $\sigma$  pair tested. Arrowhead, best model tested for each genotype. o, model passes criteria,  $p \geq 0.05$  in more than 94% of simulations. See Supplemental Table S5 for a summary of the statistical modeling outcomes.

**Figure S4. p value distributions for denticle spacing simulations compared to *in vivo* measurements.** (A-G) P value distributions for the indicated models varying  $\alpha$  at  $\sigma = D/5, D/6, D/7, D/8$ , and  $D/9$  for embryo and larval data. See Supplemental Table S5 for a summary of the statistical modeling outcomes.

**Figure S5. Effective Patronin knockdown by a transgenic Patronin shRNA**

**construct.** (A,B) Expression of Patronin shRNA transgene in stripes of cells under the control of the *engrailed*-Gal4 driver strongly decreases the level of Patronin-GFP in these cells. Examples from two different embryos are shown. Green (ubi-Patronin-GFP), red (*en-Gal4* > mCherry-Moesin). Bars, 10  $\mu\text{m}$ .

**Figure S6. Refinement of denticle position during actin coalescence and denticle formation.**

(A-H) Traces of F-actin foci during denticle formation (mid-to-late stage 14), relative to the total length of the cell for individual cells with 2, 3, or 4 denticles, showing 8 representative examples out of 32 cells analyzed from 6 embryos. Each color represents

a unique F-actin aggregate that was manually tracked over time. See also Figure 6 and Supplemental Videos S1-S3.

**Figure S7. Denticle organization in embryos with microtubule defects.**

(A) Distribution of cells with 1-5 denticles in column 1 cells of wild-type (WT), Spastin-OE, and Patronin-KD embryos. (B-D) Number of denticles/cell (B), cell length (C), and denticle spacing (D) in column 1 cells of WT, Spastin-OE, and Patronin-KD embryos. \*,  $p < 0.01$  compared to WT, Kruskal-Wallis test with Dunn's multiple comparison test. Data shown for all cells in A-C, for cells with 3 denticles only in D. (E,F) The error relative to cell length (E) or relative to the spacing distance predicted by the statistical model (F) for cells with 2 denticles (left bars) or 3 denticles (right bars) in WT, Spastin-OE, and Patronin-KD embryos. \*,  $p < 0.05$  compared to WT, Kruskal-Wallis test with Dunn's multiple comparison test. See Supplemental Tables for mean  $\pm$  standard deviation (SD) values (Supplemental Table S1), n values (Supplemental Table S2), and best-fit linear regression equations and  $R^2$  values (Supplemental Table S3). (G) Cell length vs. denticle number for column 1 cells in WT, Spastin-OE, and Patronin-KD embryos (mean $\pm$ SD). Cells with 1 or 3 denticles were significantly different in length in Patronin-KD compared to WT ( $p < 0.05$ ), Kruskal-Wallis test with Dunn's multiple comparison test.



**Figure S1**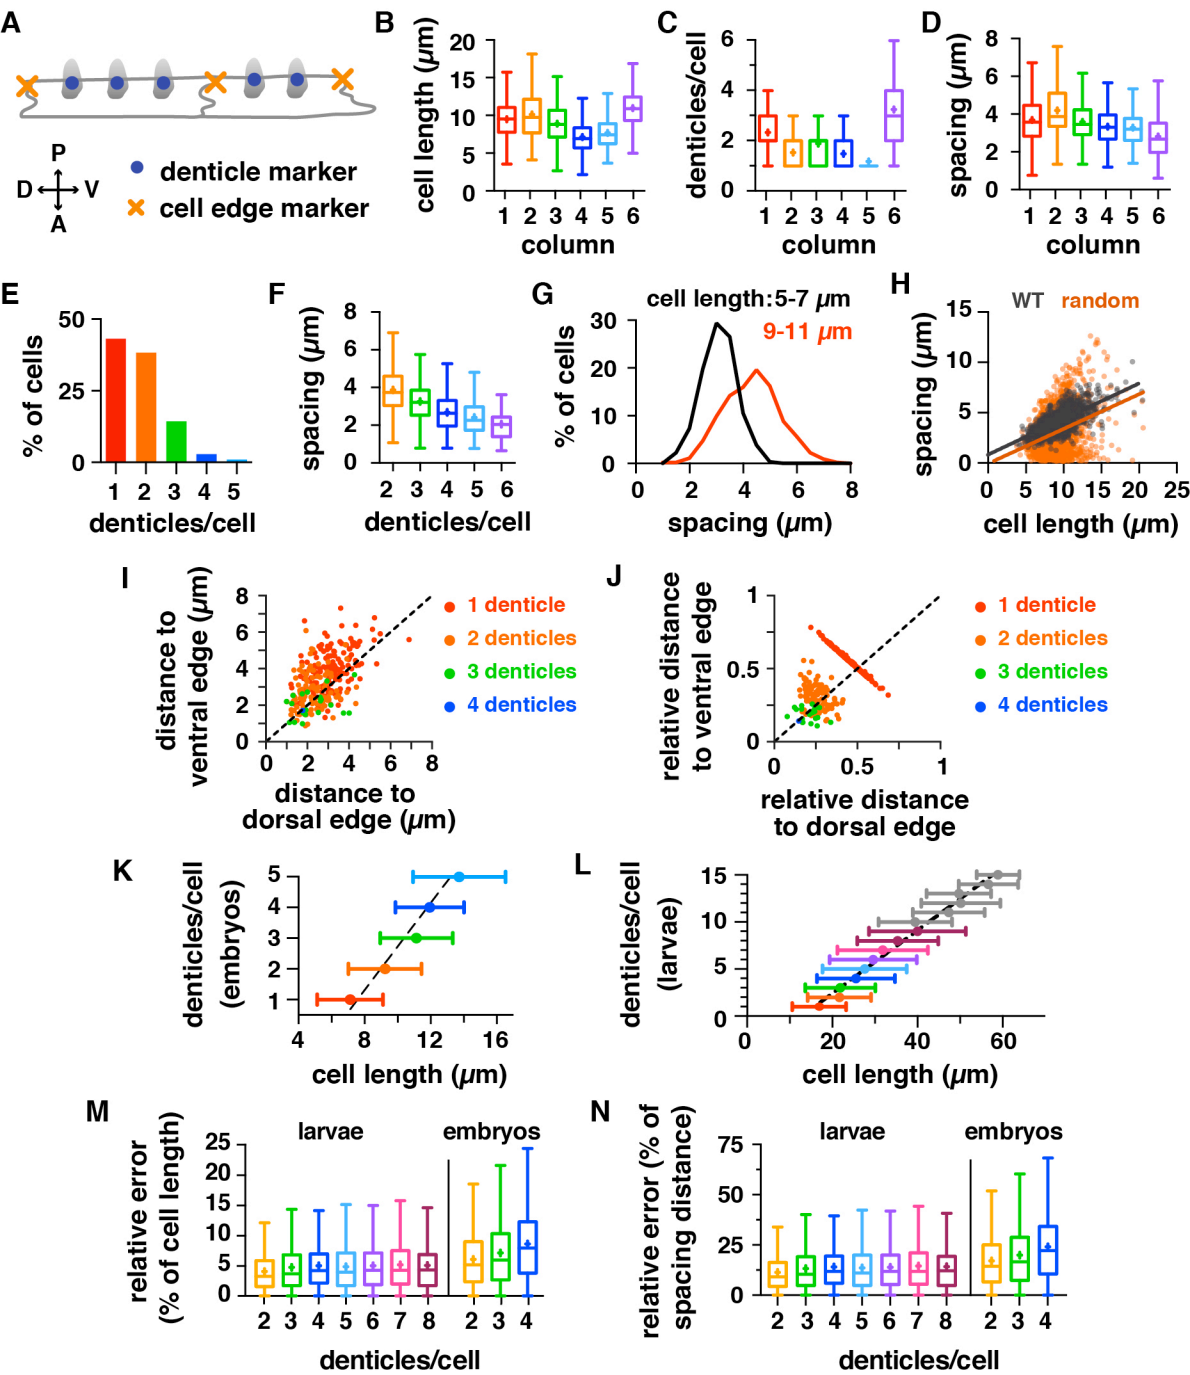

**Figure S2**

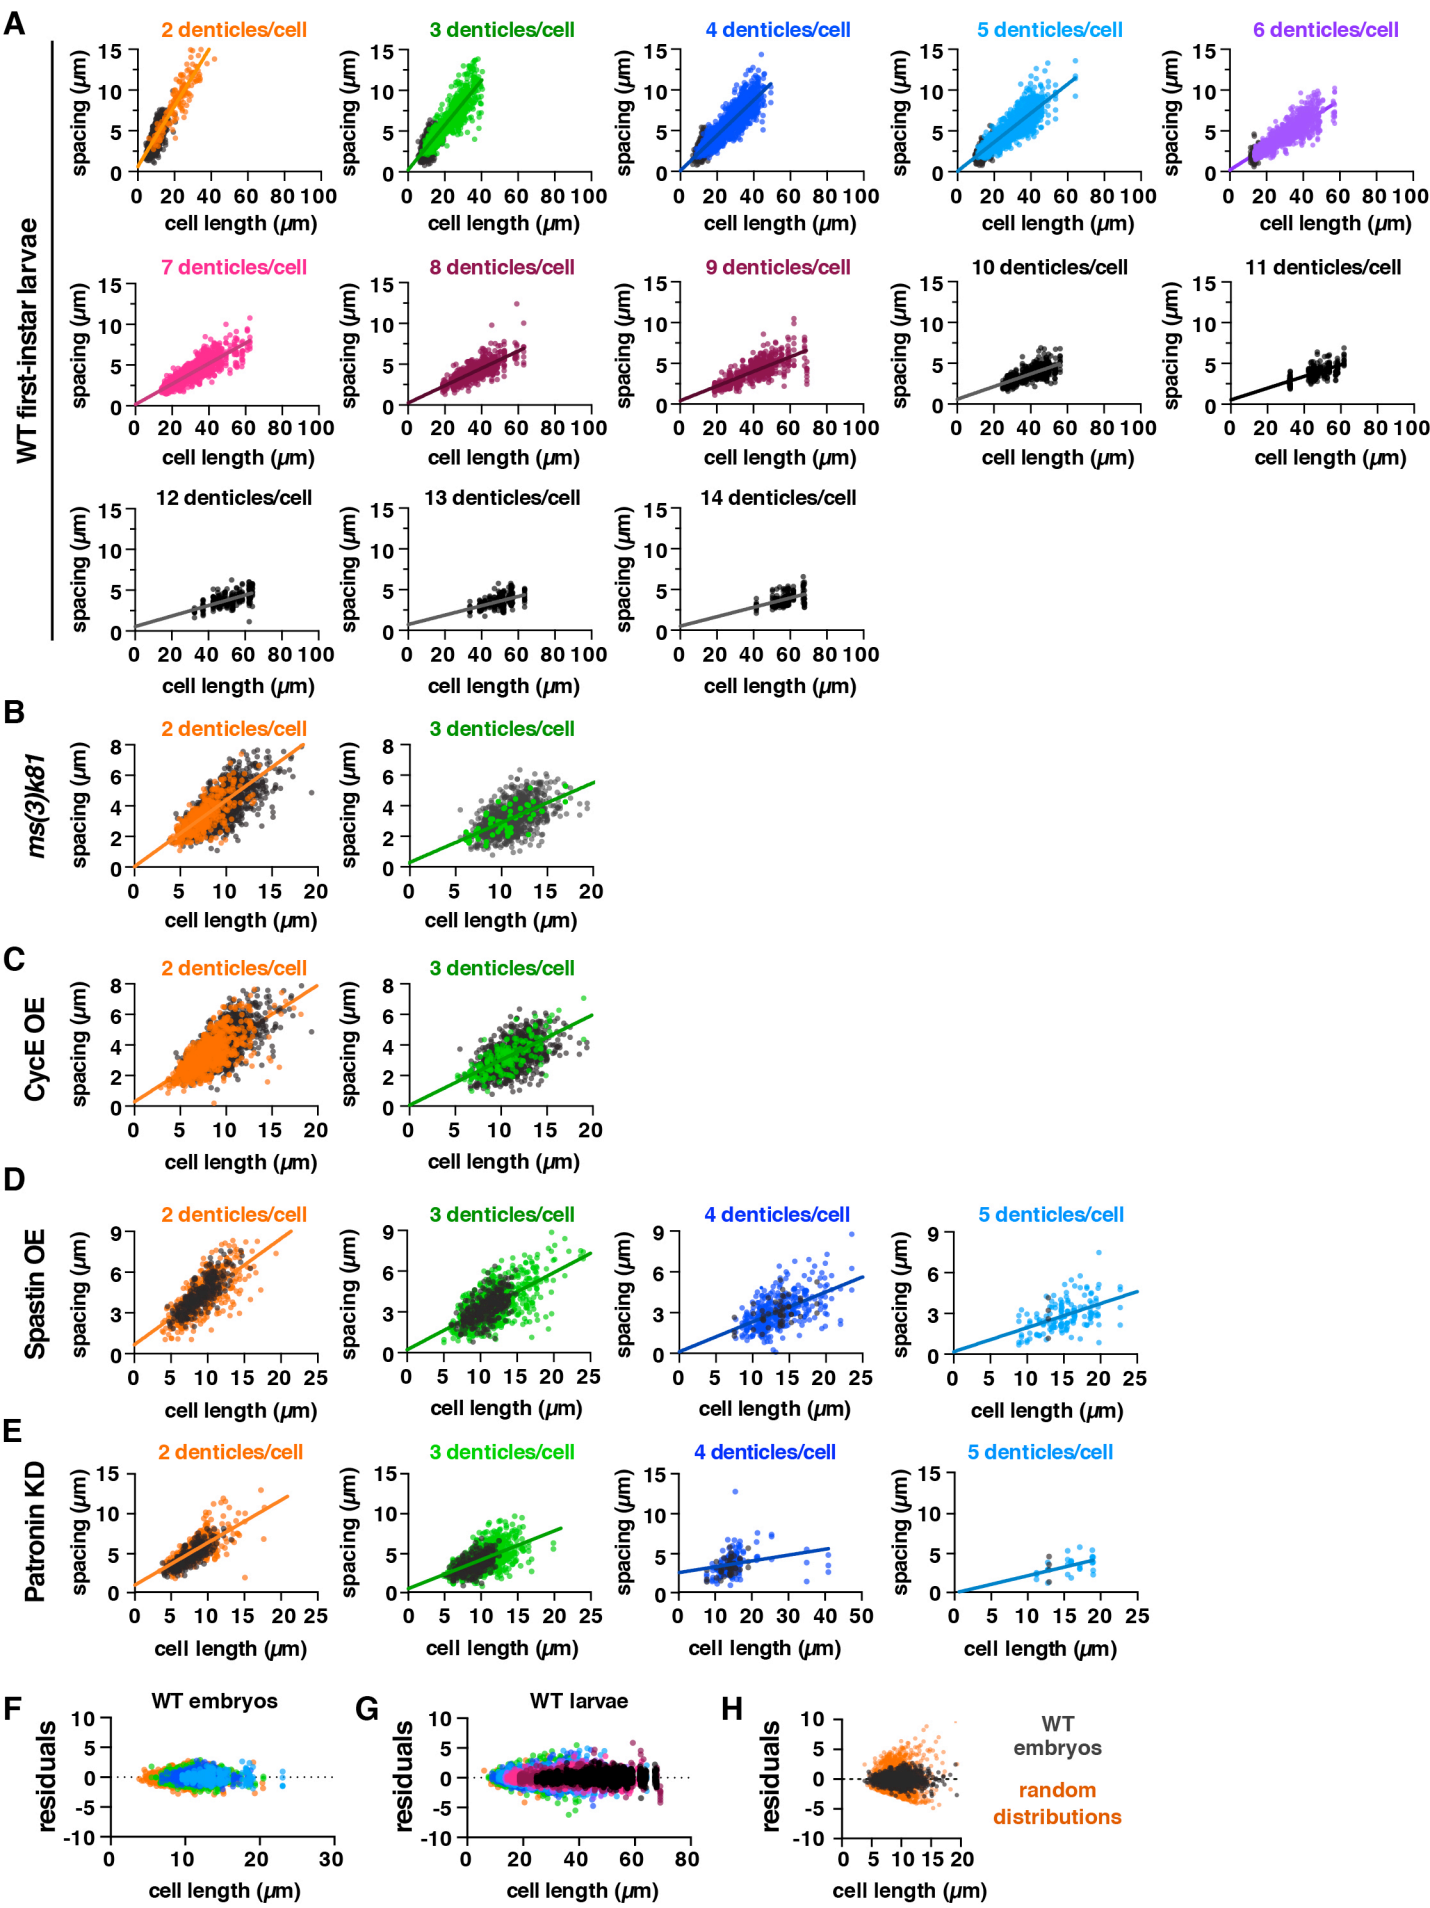

Figure S3

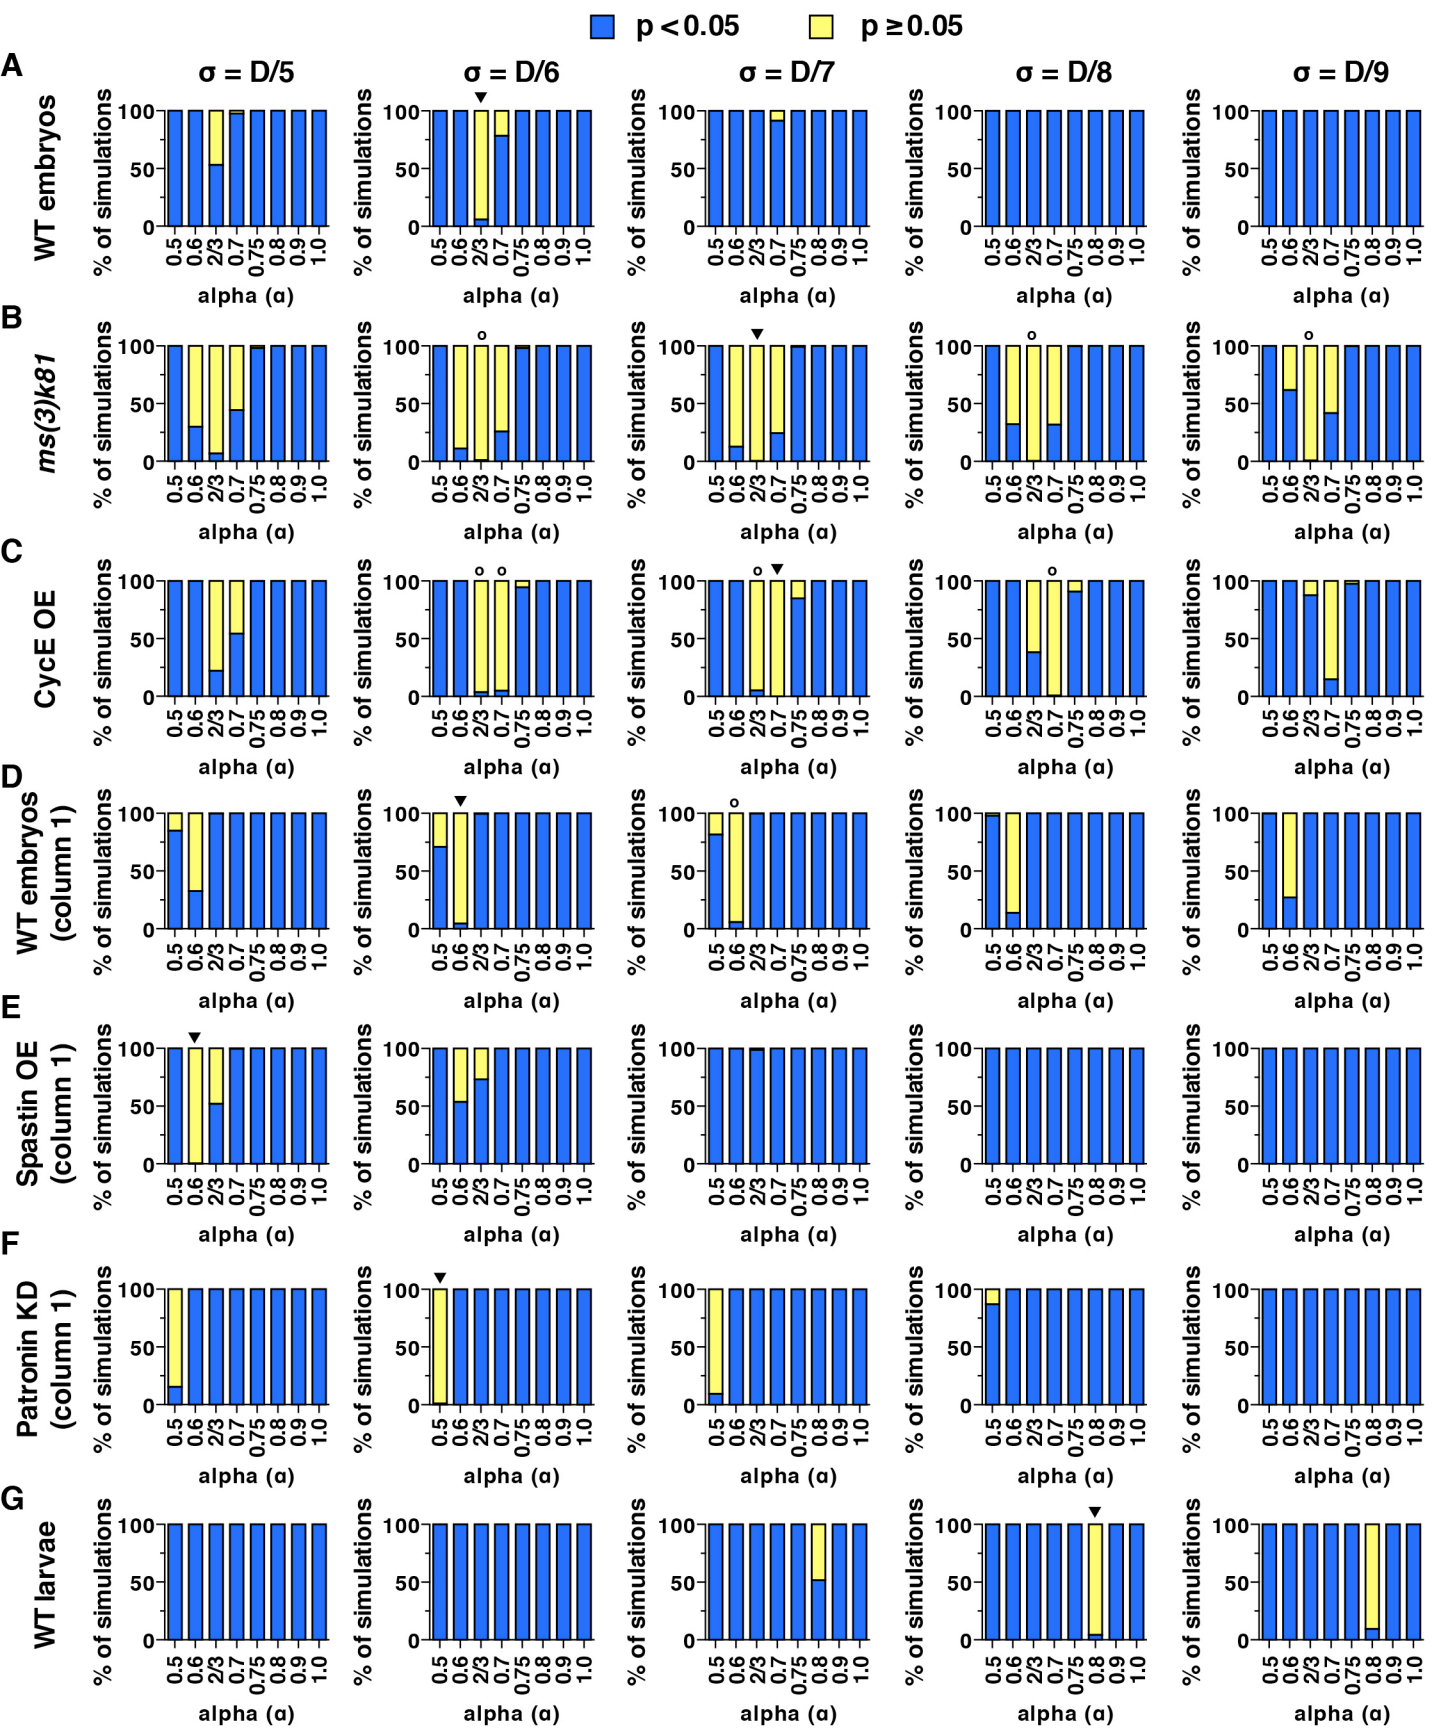

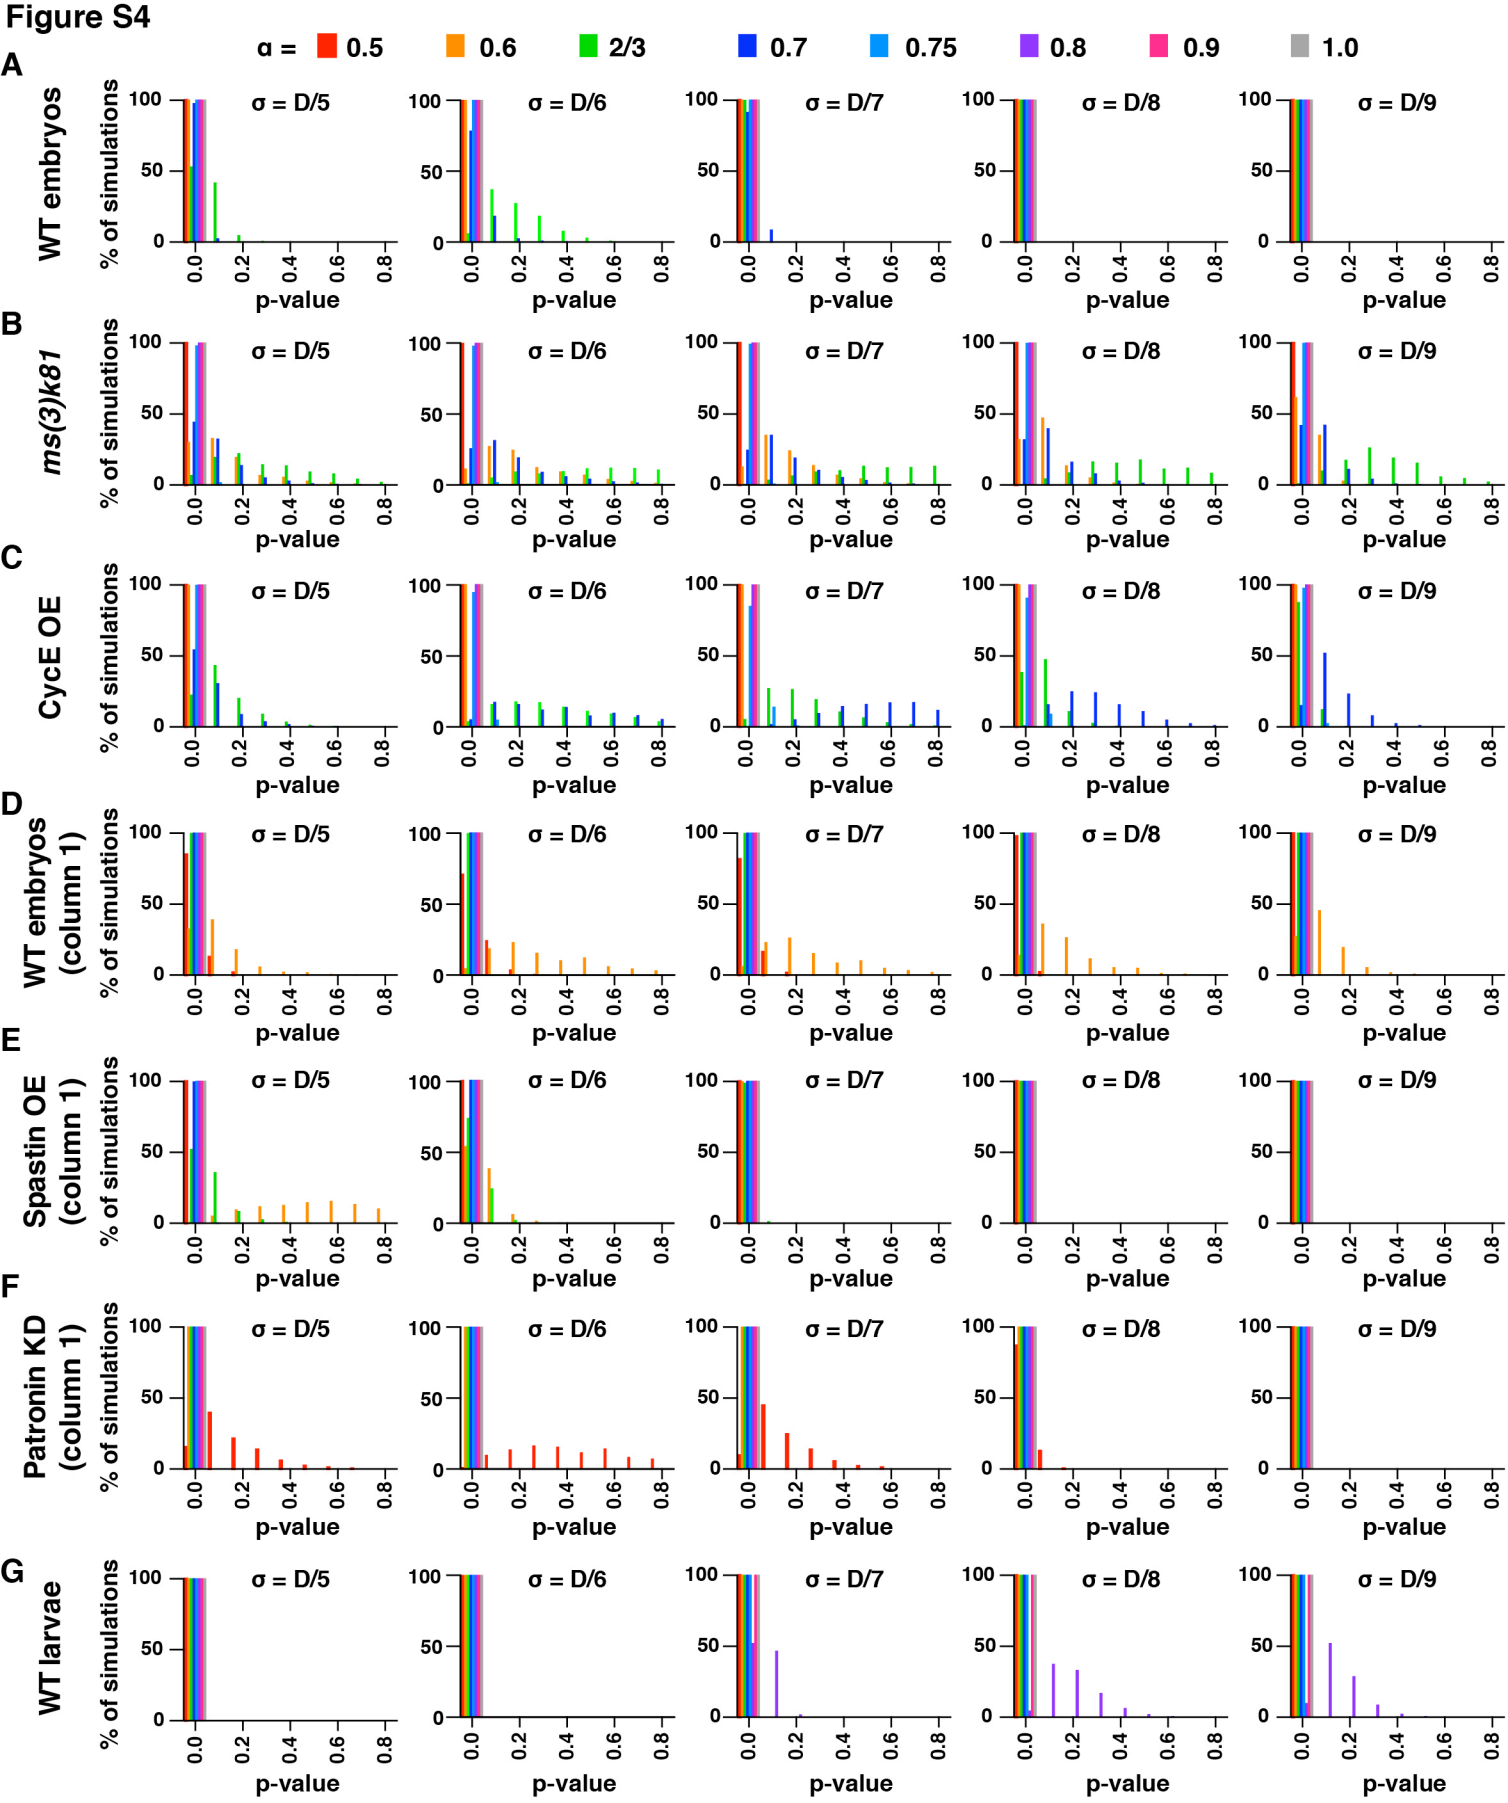

# Figure S5

en>UAS-Patronin shRNA, en>mCherry-moesin

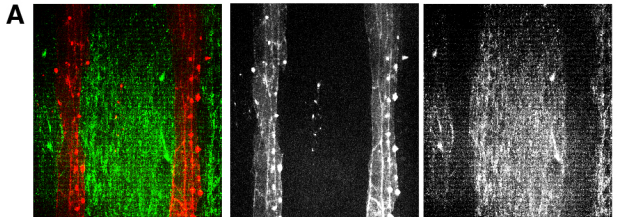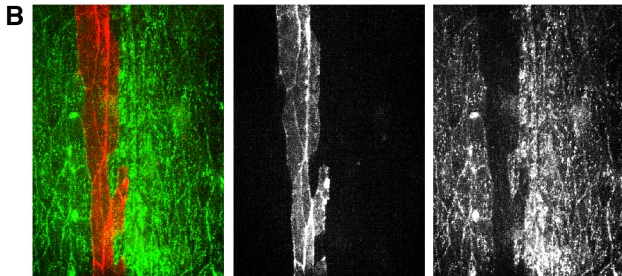

mCherry-moesin  
Patronin-GFP

mCherry-moesin

Patronin-GFP



Figure S6

**A**

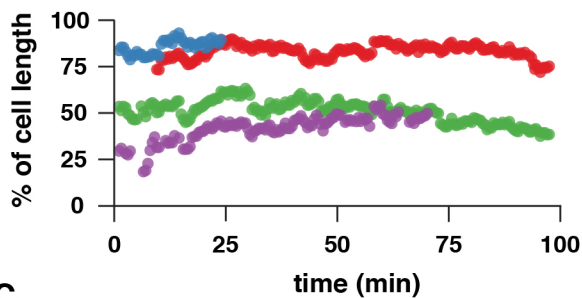

**B**

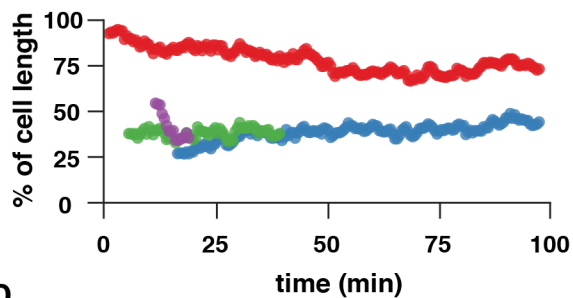

**C**

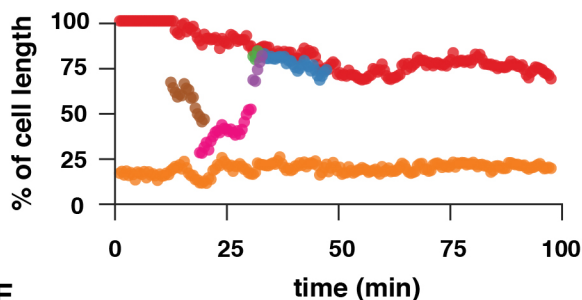

**D**

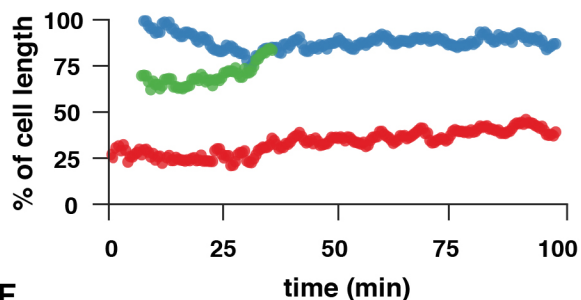

**E**

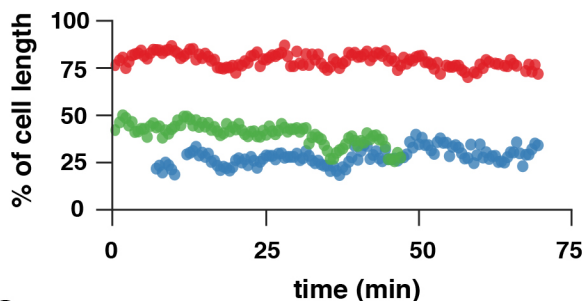

**F**

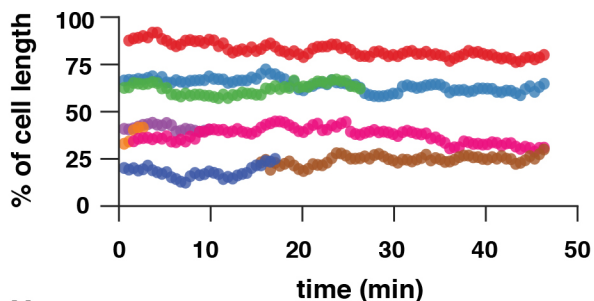

**G**

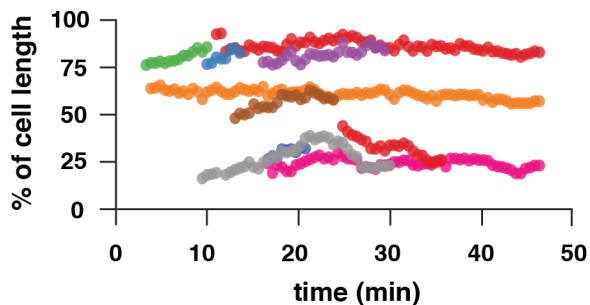

**H**

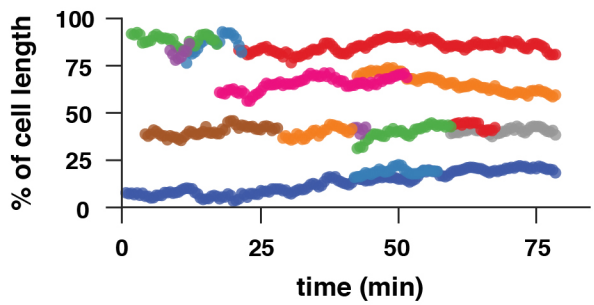

Figure S7

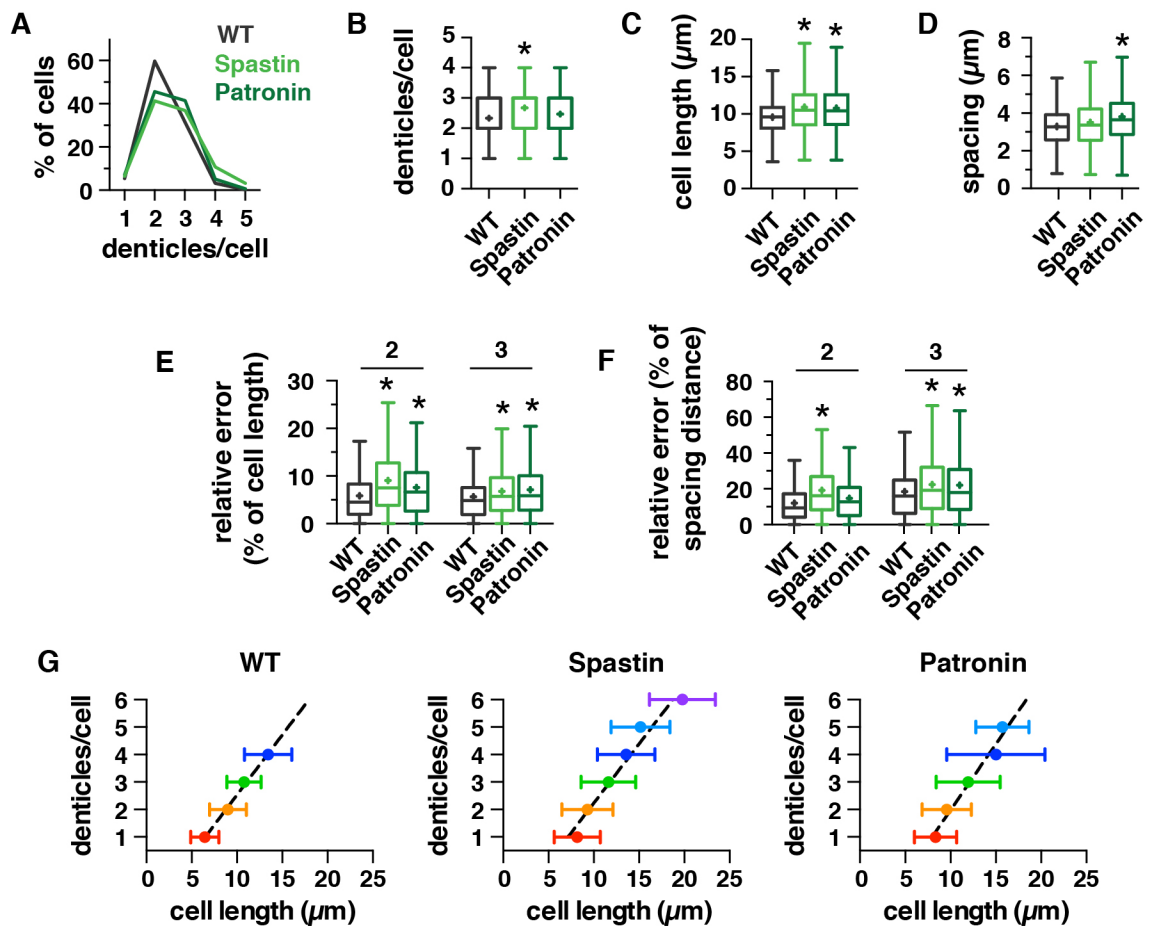

Table S1. Cell size, denticle number, and denticle spacing measurements (mean  $\pm$  SD).

|                                                                | Genotype      |                 |                |                     |                     |                      |                |                 |
|----------------------------------------------------------------|---------------|-----------------|----------------|---------------------|---------------------|----------------------|----------------|-----------------|
|                                                                | WT embryos    | <i>ms(3)k81</i> | CycE OE        | WT embryos column 1 | Spastin OE column 1 | Patronin KD column 1 | WT larvae      |                 |
| Denticles/cell                                                 | 1.9 $\pm$ 1.0 | 1.3 $\pm$ 0.5   | 1.3 $\pm$ 0.5  | 2.3 $\pm$ 0.6       | 2.7 $\pm$ 1.0       | 2.5 $\pm$ 0.7        | 5.2 $\pm$ 2.5  |                 |
| min,max denticles                                              | 1,6           | 1,4             | 1,5            | 1,5                 | 1,9                 | 1,5                  | 1,17           |                 |
| Cell length ( $\mu$ m) for cells with N denticles              | all           | 8.9 $\pm$ 2.8   | 5.8 $\pm$ 1.9  | 6.4 $\pm$ 2.4       | 9.57 $\pm$ 2.4      | 10.9 $\pm$ 3.7       | 10.8 $\pm$ 3.6 | 28.2 $\pm$ 11.5 |
|                                                                | 1             | 7.17 $\pm$ 2.0  | 5.24 $\pm$ 1.5 | 5.6 $\pm$ 1.8       | 6.4 $\pm$ 1.5       | 8.2 $\pm$ 2.5        | 8.4 $\pm$ 2.3  | 16.9 $\pm$ 6.3  |
|                                                                | 2             | 9.37 $\pm$ 2.3  | 7.5 $\pm$ 1.8  | 8.1 $\pm$ 2.2       | 9.0 $\pm$ 2.0       | 9.3 $\pm$ 2.8        | 9.6 $\pm$ 2.7  | 21.7 $\pm$ 7.5  |
|                                                                | 3             | 11.1 $\pm$ 2.2  | 10.2 $\pm$ 2.7 | 10.8 $\pm$ 2.8      | 10.8 $\pm$ 1.9      | 11.6 $\pm$ 3.0       | 12.0 $\pm$ 3.5 | 21.9 $\pm$ 8.2  |
|                                                                | 4             | 11.9 $\pm$ 2.1  | --             | --                  | 13.5 $\pm$ 2.6      | 13.6 $\pm$ 3.2       | 15.0 $\pm$ 5.4 | 25.5 $\pm$ 9.2  |
| Min. cell length ( $\mu$ m)                                    | 2.2           | 1.9             | 1.6            | 3.6                 | 3.8                 | 3.8                  | 4.6            |                 |
| Max. cell length ( $\mu$ m)                                    | 26.5          | 17.0            | 20.3           | 18.8                | 33.5                | 40.6                 | 72.0           |                 |
| Denticle spacing ( $\mu$ m) for cells with N denticles         | all           | 3.4 $\pm$ 1.2   | 3.3 $\pm$ 1.1  | 3.3 $\pm$ 1.2       | 3.7 $\pm$ 1.2       | 3.6 $\pm$ 1.4        | 4.1 $\pm$ 1.5  | 4.7 $\pm$ 2.0   |
|                                                                | 2             | 4.0 $\pm$ 1.2   | 3.3 $\pm$ 1.1  | 3.3 $\pm$ 1.2       | 4.3 $\pm$ 1.2       | 4.3 $\pm$ 1.5        | 4.9 $\pm$ 1.6  | 8.7 $\pm$ 3.0   |
|                                                                | 3             | 3.3 $\pm$ 1.0   | 3.0 $\pm$ 0.9  | 3.2 $\pm$ 1.1       | 3.3 $\pm$ 1.0       | 3.5 $\pm$ 1.3        | 3.8 $\pm$ 1.4  | 6.2 $\pm$ 5.6   |
|                                                                | 4             | 2.7 $\pm$ 0.9   | --             | --                  | 3.1 $\pm$ 0.9       | 3.1 $\pm$ 1.2        | 3.4 $\pm$ 1.4  | 5.6 $\pm$ 2.2   |
| Min. spacing ( $\mu$ m)                                        | 0.6           | 1.1             | 0.2            | 0.8                 | 0.1                 | 0.7                  | 1.1            |                 |
| Max. spacing ( $\mu$ m)                                        | 9.9           | 7.4             | 9.6            | 7.6                 | 9.8                 | 12.2                 | 16.5           |                 |
| Denticle-to-edge spacing ( $\mu$ m) for cells with N denticles | all           | 2.9 $\pm$ 1.3   | 2.4 $\pm$ 1.0  | 2.5 $\pm$ 1.3       | 2.3 $\pm$ 0.9       | 2.4 $\pm$ 1.5        | 2.3 $\pm$ 1.7  | 4.1 $\pm$ 2.8   |
|                                                                | 1             | 3.6 $\pm$ 1.4   | 2.6 $\pm$ 0.9  | 2.8 $\pm$ 1.1       | 3.2 $\pm$ 1.0       | 4.1 $\pm$ 2.2        | 4.2 $\pm$ 1.7  | 8.7 $\pm$ 3.7   |
|                                                                | 2             | 2.7 $\pm$ 1.2   | 2.1 $\pm$ 0.8  | 2.4 $\pm$ 1.0       | 2.4 $\pm$ 0.9       | 2.5 $\pm$ 1.4        | 2.4 $\pm$ 1.2  | 6.7 $\pm$ 2.9   |
|                                                                | 3             | 2.4 $\pm$ 1.0   | 2.2 $\pm$ 0.9  | 2.2 $\pm$ 1.0       | 2.1 $\pm$ 0.7       | 2.4 $\pm$ 1.3        | 2.2 $\pm$ 1.7  | 5.0 $\pm$ 2.5   |
| Mean absolute error of spacing ( $\mu$ m)                      | 4             | 2.0 $\pm$ 0.9   | --             | --                  | 2.2 $\pm$ 0.9       | 2.2 $\pm$ 1.2        | 2.6 $\pm$ 3.1  | 4.7 $\pm$ 2.2   |
|                                                                | 2             | 0.68            | 0.58           | 0.68                | 0.52                | 0.83                 | 0.75           | 0.96            |
|                                                                | 3             | 0.65            | 0.51           | 0.61                | 0.60                | 0.78                 | 0.86           | 0.85            |
| Root mean squared error of spacing ( $\mu$ m)                  | 4             | 0.64            | --             | --                  | 0.65                | 0.79                 | 0.93           | 0.77            |
|                                                                | 2             | 0.87            | 0.74           | 0.90                | 0.68                | 1.06                 | 1.05           | 1.27            |
|                                                                | 3             | 0.83            | 0.64           | 0.82                | 0.79                | 1.01                 | 1.17           | 1.21            |
|                                                                | 4             | 0.79            | --             | --                  | 0.80                | 1.03                 | 1.32           | 1.03            |



Table S2. Number of animals, denticles, and cells analyzed for each genotype.

|                                      | Genotype   |                 |         |                     |                     |                      |           |     |
|--------------------------------------|------------|-----------------|---------|---------------------|---------------------|----------------------|-----------|-----|
|                                      | WT embryos | <i>ms(3)k81</i> | CycE OE | WT embryos column 1 | Spastin OE column 1 | Patronin KD column 1 | WT larvae |     |
| <b>Animals</b>                       | 12         | 10              | 13      | 12                  | 36                  | 29                   | 18        |     |
| <b>Total cells for genotype</b>      | 3092       | 1704            | 3120    | 497                 | 1103                | 1054                 | 2150      |     |
| <b>Total denticles for genotype</b>  | 5833       | 2130            | 4071    | 1158                | 2951                | 2598                 | 11062     |     |
| <b>Cells/animal, min:max</b>         | 190-370    | 62-245          | 35-350  | 30-70               | 25842               | 20-60                | 30-240    |     |
| <b>Denticles/animal, min:max</b>     | 360-700    | 90-300          | 50-460  | 60-150              | 25-165              | 45-140               | 180-1160  |     |
| <b>Cells with <i>N</i> denticles</b> | <b>1</b>   | 1284            | 1310    | 2274                | 27                  | 71                   | 76        | 21  |
|                                      | <b>2</b>   | 1140            | 364     | 750                 | 297                 | 456                  | 480       | 157 |
|                                      | <b>3</b>   | 476             | 28      | 89                  | 156                 | 407                  | 436       | 379 |
|                                      | <b>4</b>   | 130             | 2       | 5                   | 16                  | 119                  | 54        | 452 |
|                                      | <b>5</b>   | 51              | 0       | 2                   | 1                   | 35                   | 7         | 395 |
|                                      | <b>6</b>   | 11              | 0       | 0                   | 0                   | 12                   | 0         | 278 |
|                                      | <b>7</b>   | 0               | 0       | 0                   | 0                   | 1                    | 0         | 164 |
|                                      | <b>8</b>   | 0               | 0       | 0                   | 0                   | 1                    | 0         | 97  |
|                                      | <b>9</b>   | 0               | 0       | 0                   | 0                   | 1                    | 0         | 75  |
|                                      | <b>10</b>  | 0               | 0       | 0                   | 0                   | 0                    | 0         | 51  |
|                                      | <b>11</b>  | 0               | 0       | 0                   | 0                   | 0                    | 0         | 21  |
|                                      | <b>12</b>  | 0               | 0       | 0                   | 0                   | 0                    | 0         | 20  |
|                                      | <b>13</b>  | 0               | 0       | 0                   | 0                   | 0                    | 0         | 18  |
|                                      | <b>14</b>  | 0               | 0       | 0                   | 0                   | 0                    | 0         | 13  |
|                                      | <b>15</b>  | 0               | 0       | 0                   | 0                   | 0                    | 0         | 4   |
|                                      | <b>16</b>  | 0               | 0       | 0                   | 0                   | 0                    | 0         | 2   |
|                                      | <b>17</b>  | 0               | 0       | 0                   | 0                   | 0                    | 0         | 3   |

Table S3. Best-fit linear regression data for each genotype.

| Cells with N denticles |                | Genotype          |                   |                   |                     |                     |                      |                   |
|------------------------|----------------|-------------------|-------------------|-------------------|---------------------|---------------------|----------------------|-------------------|
|                        |                | WT embryos        | <i>ms(3)k81</i>   | CycE OE           | WT embryos column 1 | Spastin OE column 1 | Patronin KD column 1 | WT larvae         |
| 2                      | Equation       | y = 0.36x + 0.63  | y = 0.43x + 0.031 | y = 0.38x + 0.29  | y = 0.47x + 0.10    | y = 0.39x + 0.66    | y = 0.42x + 0.86     | y = 0.37x + 0.63  |
|                        | R <sup>2</sup> | 0.48              | 0.52              | 0.48              | 0.66                | 0.52                | 0.54                 | 0.82              |
| 3                      | Equation       | y = 0.24x + 0.64  | y = 0.26x + 0.30  | y = 0.30x + 0.062 | y = 0.30x + 0.03    | y = 0.28x + 0.22    | y = 0.19x + 1.5      | y = 0.27x + 0.23  |
|                        | R <sup>2</sup> | 0.28              | 0.53              | 0.55              | 0.34                | 0.42                | 0.25                 | 0.78              |
| 4                      | Equation       | y = 0.21x + 0.21  | --                | --                | y = 0.18x + 0.70    | y = 0.22x + 0.12    | y = 0.069x + 2.4     | y = 0.22x + 0.094 |
|                        | R <sup>2</sup> | 0.23              | --                | --                | 0.24                | 0.31                | 0.074                | 0.79              |
| 5                      | Equation       | y = 0.15x + 0.32  | --                | --                | --                  | y = 0.18x + 0.19    | y = 0.20x - 0.13     | y = 0.18x + 0.07  |
|                        | R <sup>2</sup> | 0.21              | --                | --                | --                  | 0.24                | 0.28                 | 0.78              |
| 6                      | Equation       | y = 0.093x + 0.80 | --                | --                | --                  | y = 0.14*x + 0.17   | --                   | y = 0.14x + 0.19  |
|                        | R <sup>2</sup> | 0.02              | --                | --                | --                  | 0.25                | --                   | 0.76              |
| 7                      | Equation       | --                | --                | --                | --                  | --                  | --                   | y = 0.13x + 0.18  |
|                        | R <sup>2</sup> | --                | --                | --                | --                  | --                  | --                   | 0.73              |
| 8                      | Equation       | --                | --                | --                | --                  | --                  | --                   | y = 0.11x + 0.25  |
|                        | R <sup>2</sup> | --                | --                | --                | --                  | --                  | --                   | 0.62              |
| 9                      | Equation       | --                | --                | --                | --                  | --                  | --                   | y = 0.090x + 0.42 |
|                        | R <sup>2</sup> | --                | --                | --                | --                  | --                  | --                   | 0.56              |
| 10                     | Equation       | --                | --                | --                | --                  | --                  | --                   | y = 0.08x + 0.59  |
|                        | R <sup>2</sup> | --                | --                | --                | --                  | --                  | --                   | 0.5               |
| 11                     | Equation       | --                | --                | --                | --                  | --                  | --                   | y = 0.072x + 0.53 |
|                        | R <sup>2</sup> | --                | --                | --                | --                  | --                  | --                   | 0.41              |
| 12                     | Equation       | --                | --                | --                | --                  | --                  | --                   | y = 0.064x + 0.55 |
|                        | R <sup>2</sup> | --                | --                | --                | --                  | --                  | --                   | 0.41              |
| 13                     | Equation       | --                | --                | --                | --                  | --                  | --                   | y = 0.057x + 0.73 |
|                        | R <sup>2</sup> | --                | --                | --                | --                  | --                  | --                   | 0.28              |
| 14                     | Equation       | --                | --                | --                | --                  | --                  | --                   | y = 0.058x + 0.51 |
|                        | R <sup>2</sup> | --                | --                | --                | --                  | --                  | --                   | 0.24              |

**Table S4. Summary of Monte Carlo simulations.** Models that meet the cutoff criteria are indicated in red.

| Cells analyzed | Random model is acceptable ( $\geq 95\%$ pass) (YES/no) | # of Monte Carlo simulations consistent with <i>in vivo</i> distribution ( $p \geq 0.05$ ) (out of 10,000) | Fraction that pass (% with $p \geq 0.05$ ) | Fraction that fail (% with $p < 0.05$ ) |
|----------------|---------------------------------------------------------|------------------------------------------------------------------------------------------------------------|--------------------------------------------|-----------------------------------------|
| All cells      | no                                                      | 0                                                                                                          | 0                                          | 100                                     |
| 1 denticle     | no                                                      | 0                                                                                                          | 0                                          | 100                                     |
| 2 denticles    | no                                                      | 0                                                                                                          | 0                                          | 100                                     |
| 3 denticles    | no                                                      | 0                                                                                                          | 0                                          | 100                                     |
| 4 denticles    | no                                                      | 5136                                                                                                       | 51.36                                      | 48.64                                   |

**Table S5. Summary of statistical modeling outcomes for 40 combinations of alpha and sigma in all genotypes.**  
 Models that meet the cutoff criteria are indicated in red; the best-fit model tested is indicated in bold with an asterisk.

| Genotype        | Model      |              | Model is acceptable ( $\geq 94\%$ pass) (YES/no) | # of simulations consistent with <i>in vivo</i> distribution ( $p \geq 0.05$ ) (out of 10,000) | Fraction that pass (% with $p \geq 0.05$ ) | Fraction that fail (% with $p < 0.05$ ) |
|-----------------|------------|--------------|--------------------------------------------------|------------------------------------------------------------------------------------------------|--------------------------------------------|-----------------------------------------|
|                 | $\sigma =$ | $\alpha =$   |                                                  |                                                                                                |                                            |                                         |
| WT embryos      | D/5        | 0.5          | no                                               | 0                                                                                              | 0                                          | 100                                     |
|                 |            | 0.6          | no                                               | 0                                                                                              | 0                                          | 100                                     |
|                 |            | 0.667        | no                                               | 4699                                                                                           | 46.99                                      | 53.01                                   |
|                 |            | 0.7          | no                                               | 238                                                                                            | 2.38                                       | 97.62                                   |
|                 |            | 0.75         | no                                               | 0                                                                                              | 0                                          | 100                                     |
|                 |            | 0.8          | no                                               | 0                                                                                              | 0                                          | 100                                     |
|                 |            | 0.9          | no                                               | 0                                                                                              | 0                                          | 100                                     |
|                 |            | 1            | no                                               | 0                                                                                              | 0                                          | 100                                     |
|                 | D/6        | 0.5          | no                                               | 0                                                                                              | 0                                          | 100                                     |
|                 |            | 0.6          | no                                               | 0                                                                                              | 0                                          | 100                                     |
|                 |            | <b>0.667</b> | <b>YES*</b>                                      | <b>9413</b>                                                                                    | <b>94.13</b>                               | <b>5.87</b>                             |
|                 |            | 0.7          | no                                               | 2167                                                                                           | 21.67                                      | 78.33                                   |
|                 |            | 0.75         | no                                               | 0                                                                                              | 0                                          | 100                                     |
|                 |            | 0.8          | no                                               | 0                                                                                              | 0                                          | 100                                     |
|                 |            | 0.9          | no                                               | 0                                                                                              | 0                                          | 100                                     |
|                 |            | 1            | no                                               | 0                                                                                              | 0                                          | 100                                     |
|                 | D/7        | 0.5          | no                                               | 0                                                                                              | 0                                          | 100                                     |
|                 |            | 0.6          | no                                               | 0                                                                                              | 0                                          | 100                                     |
|                 |            | 0.667        | no                                               | 21                                                                                             | 0.21                                       | 99.79                                   |
|                 |            | 0.7          | no                                               | 851                                                                                            | 8.51                                       | 91.49                                   |
|                 |            | 0.75         | no                                               | 0                                                                                              | 0                                          | 100                                     |
|                 |            | 0.8          | no                                               | 0                                                                                              | 0                                          | 100                                     |
|                 |            | 0.9          | no                                               | 0                                                                                              | 0                                          | 100                                     |
|                 |            | 1            | no                                               | 0                                                                                              | 0                                          | 100                                     |
|                 | D/8        | 0.5          | no                                               | 0                                                                                              | 0                                          | 100                                     |
|                 |            | 0.6          | no                                               | 0                                                                                              | 0                                          | 100                                     |
|                 |            | 0.667        | no                                               | 0                                                                                              | 0                                          | 100                                     |
|                 |            | 0.7          | no                                               | 0                                                                                              | 0                                          | 100                                     |
|                 |            | 0.75         | no                                               | 0                                                                                              | 0                                          | 100                                     |
|                 |            | 0.8          | no                                               | 0                                                                                              | 0                                          | 100                                     |
|                 |            | 0.9          | no                                               | 0                                                                                              | 0                                          | 100                                     |
|                 |            | 1            | no                                               | 0                                                                                              | 0                                          | 100                                     |
|                 | D/9        | 0.5          | no                                               | 0                                                                                              | 0                                          | 100                                     |
|                 |            | 0.6          | no                                               | 0                                                                                              | 0                                          | 100                                     |
|                 |            | 0.667        | no                                               | 0                                                                                              | 0                                          | 100                                     |
| 0.7             |            | no           | 0                                                | 0                                                                                              | 100                                        |                                         |
| 0.75            |            | no           | 0                                                | 0                                                                                              | 100                                        |                                         |
| 0.8             |            | no           | 0                                                | 0                                                                                              | 100                                        |                                         |
| 0.9             |            | no           | 0                                                | 0                                                                                              | 100                                        |                                         |
| 1               |            | no           | 0                                                | 0                                                                                              | 100                                        |                                         |
| <i>ms(3)k81</i> | D/5        | 0.5          | no                                               | 0                                                                                              | 0                                          | 100                                     |
|                 |            | 0.6          | no                                               | 6991                                                                                           | 69.91                                      | 30.09                                   |
|                 |            | 0.667        | no                                               | 9320                                                                                           | 93.2                                       | 6.8                                     |
|                 |            | 0.7          | no                                               | 5561                                                                                           | 55.61                                      | 44.39                                   |
|                 |            | 0.75         | no                                               | 189                                                                                            | 1.89                                       | 98.11                                   |
|                 |            | 0.8          | no                                               | 0                                                                                              | 0                                          | 100                                     |
|                 |            | 0.9          | no                                               | 0                                                                                              | 0                                          | 100                                     |
|                 |            | 1            | no                                               | 0                                                                                              | 0                                          | 100                                     |
|                 | D/6        | 0.5          | no                                               | 0                                                                                              | 0                                          | 100                                     |
|                 |            | 0.6          | no                                               | 8878                                                                                           | 88.78                                      | 11.22                                   |

|            |              |             |             |              |             |
|------------|--------------|-------------|-------------|--------------|-------------|
|            | 0.667        | YES         | 9908        | 99.08        | 0.92        |
|            | 0.7          | no          | 7423        | 74.23        | 25.77       |
|            | 0.75         | no          | 179         | 1.79         | 98.21       |
|            | 0.8          | no          | 0           | 0            | 100         |
|            | 0.9          | no          | 0           | 0            | 100         |
|            | 1            | no          | 0           | 0            | 100         |
| <b>D/7</b> | 0.5          | no          | 0           | 0            | 100         |
|            | 0.6          | no          | 8731        | 87.31        | 12.69       |
|            | <b>0.667</b> | <b>YES*</b> | <b>9967</b> | <b>99.67</b> | <b>0.33</b> |
|            | 0.7          | no          | 7544        | 75.44        | 24.56       |
|            | 0.75         | no          | 83          | 0.83         | 99.17       |
|            | 0.8          | no          | 0           | 0            | 100         |
|            | 0.9          | no          | 0           | 0            | 100         |
|            | 1            | no          | 0           | 0            | 100         |
| <b>D/8</b> | 0.5          | no          | 0           | 0            | 100         |
|            | 0.6          | no          | 6783        | 67.83        | 32.17       |
|            | 0.667        | YES         | 9957        | 99.57        | 0.43        |
|            | 0.7          | no          | 6813        | 68.13        | 31.87       |
|            | 0.75         | no          | 12          | 0.12         | 99.88       |
|            | 0.8          | no          | 0           | 0            | 100         |
|            | 0.9          | no          | 0           | 0            | 100         |
|            | 1            | no          | 0           | 0            | 100         |
| <b>D/9</b> | 0.5          | no          | 0           | 0            | 100         |
|            | 0.6          | no          | 3831        | 38.31        | 61.69       |
|            | 0.667        | YES         | 9931        | 99.31        | 0.69        |
|            | 0.7          | no          | 5812        | 58.12        | 41.88       |
|            | 0.75         | no          | 1           | 0.01         | 99.99       |
|            | 0.8          | no          | 0           | 0            | 100         |
|            | 0.9          | no          | 0           | 0            | 100         |
|            | 1            | no          | 0           | 0            | 100         |
| <b>D/5</b> | 0.5          | no          | 0           | 0            | 100         |
|            | 0.6          | no          | 2           | 0.02         | 99.98       |
|            | 0.667        | no          | 7761        | 77.61        | 22.39       |
|            | 0.7          | no          | 4559        | 45.59        | 54.41       |
|            | 0.75         | no          | 21          | 0.21         | 99.79       |
|            | 0.8          | no          | 0           | 0            | 100         |
|            | 0.9          | no          | 0           | 0            | 100         |
|            | 1            | no          | 0           | 0            | 100         |
| <b>D/6</b> | 0.5          | no          | 0           | 0            | 100         |
|            | 0.6          | no          | 0           | 0            | 100         |
|            | 0.667        | YES         | 9629        | 96.29        | 3.71        |
|            | 0.7          | YES         | 9498        | 94.98        | 5.02        |
|            | 0.75         | no          | 534         | 5.34         | 94.66       |
|            | 0.8          | no          | 0           | 0            | 100         |
|            | 0.9          | no          | 0           | 0            | 100         |
|            | 1            | no          | 0           | 0            | 100         |
| <b>D/7</b> | 0.5          | no          | 0           | 0            | 100         |
|            | 0.6          | no          | 0           | 0            | 100         |
|            | 0.667        | YES         | 9484        | 94.84        | 5.16        |
|            | <b>0.7</b>   | <b>YES*</b> | <b>9992</b> | <b>99.92</b> | <b>0.08</b> |
|            | 0.75         | no          | 1499        | 14.99        | 85.01       |
|            | 0.8          | no          | 0           | 0            | 100         |
|            | 0.9          | no          | 0           | 0            | 100         |
|            | 1            | no          | 0           | 0            | 100         |
| <b>D/8</b> | 0.5          | no          | 0           | 0            | 100         |
|            | 0.6          | no          | 0           | 0            | 100         |
|            | 0.667        | no          | 6166        | 61.66        | 38.34       |
|            | 0.7          | YES         | 9918        | 99.18        | 0.82        |
|            | 0.75         | no          | 929         | 9.29         | 90.71       |
|            | 0.8          | no          | 0           | 0            | 100         |
|            | 0.9          | no          | 0           | 0            | 100         |

CycE OE

|                                    |            |             |             |              |              |             |       |
|------------------------------------|------------|-------------|-------------|--------------|--------------|-------------|-------|
|                                    |            | 1           | no          | 0            | 0            | 100         |       |
| WT<br>embryos,<br>column 1<br>only | D/9        | 0.5         | no          | 0            | 0            | 100         |       |
|                                    |            | 0.6         | no          | 0            | 0            | 100         |       |
|                                    |            | 0.667       | no          | 1241         | 12.41        | 87.59       |       |
|                                    |            | 0.7         | no          | 8531         | 85.31        | 14.69       |       |
|                                    |            | 0.75        | no          | 233          | 2.33         | 97.67       |       |
|                                    |            | 0.8         | no          | 0            | 0            | 100         |       |
|                                    |            | 0.9         | no          | 0            | 0            | 100         |       |
|                                    |            | 1           | no          | 0            | 0            | 100         |       |
|                                    |            | D/5         | 0.5         | no           | 1493         | 14.93       | 85.07 |
|                                    |            |             | 0.6         | no           | 6738         | 67.38       | 32.62 |
| 0.667                              | no         |             | 12          | 0.12         | 99.88        |             |       |
| 0.7                                | no         |             | 0           | 0            | 100          |             |       |
| 0.75                               | no         |             | 0           | 0            | 100          |             |       |
| 0.8                                | no         |             | 0           | 0            | 100          |             |       |
| 0.9                                | no         |             | 0           | 0            | 100          |             |       |
| 1                                  | no         |             | 0           | 0            | 100          |             |       |
| D/6                                | 0.5        | no          | 2885        | 28.85        | 71.15        |             |       |
|                                    | <b>0.6</b> | <b>YES*</b> | <b>9547</b> | <b>95.47</b> | <b>4.53</b>  |             |       |
|                                    | 0.667      | no          | 32          | 0.32         | 99.68        |             |       |
|                                    | 0.7        | no          | 0           | 0            | 100          |             |       |
|                                    | 0.75       | no          | 0           | 0            | 100          |             |       |
|                                    | 0.8        | no          | 0           | 0            | 100          |             |       |
|                                    | 0.9        | no          | 0           | 0            | 100          |             |       |
|                                    | 1          | no          | 0           | 0            | 100          |             |       |
| D/7                                | 0.5        | no          | 1826        | 18.26        | 81.74        |             |       |
|                                    | 0.6        | <b>YES</b>  | 9419        | 94.19        | 5.81         |             |       |
|                                    | 0.667      | no          | 4           | 0.04         | 99.96        |             |       |
|                                    | 0.7        | no          | 0           | 0            | 100          |             |       |
|                                    | 0.75       | no          | 0           | 0            | 100          |             |       |
|                                    | 0.8        | no          | 0           | 0            | 100          |             |       |
|                                    | 0.9        | no          | 0           | 0            | 100          |             |       |
|                                    | 1          | no          | 0           | 0            | 100          |             |       |
| D/8                                | 0.5        | no          | 216         | 2.16         | 97.84        |             |       |
|                                    | 0.6        | no          | 8617        | 86.17        | 13.83        |             |       |
|                                    | 0.667      | no          | 0           | 0            | 100          |             |       |
|                                    | 0.7        | no          | 0           | 0            | 100          |             |       |
|                                    | 0.75       | no          | 0           | 0            | 100          |             |       |
|                                    | 0.8        | no          | 0           | 0            | 100          |             |       |
|                                    | 0.9        | no          | 0           | 0            | 100          |             |       |
|                                    | 1          | no          | 0           | 0            | 100          |             |       |
| D/9                                | 0.5        | no          | 4           | 0.04         | 99.96        |             |       |
|                                    | 0.6        | no          | 7278        | 72.78        | 27.22        |             |       |
|                                    | 0.667      | no          | 0           | 0            | 100          |             |       |
|                                    | 0.7        | no          | 0           | 0            | 100          |             |       |
|                                    | 0.75       | no          | 0           | 0            | 100          |             |       |
|                                    | 0.8        | no          | 0           | 0            | 100          |             |       |
|                                    | 0.9        | no          | 0           | 0            | 100          |             |       |
|                                    | 1          | no          | 0           | 0            | 100          |             |       |
| Spastin<br>OE,<br>column 1         | D/5        | 0.5         | no          | 0            | 0            | 100         |       |
|                                    |            | <b>0.6</b>  | <b>YES*</b> | <b>9969</b>  | <b>99.69</b> | <b>0.31</b> |       |
|                                    |            | 0.667       | no          | 4800         | 48           | 52          |       |
|                                    |            | 0.7         | no          | 30           | 0.3          | 99.7        |       |
|                                    |            | 0.75        | no          | 0            | 0            | 100         |       |
|                                    |            | 0.8         | no          | 0            | 0            | 100         |       |
|                                    |            | 0.9         | no          | 0            | 0            | 100         |       |
|                                    |            | 1           | no          | 0            | 0            | 100         |       |
|                                    | D/6        | 0.5         | no          | 0            | 0            | 100         |       |
|                                    |            | 0.6         | no          | 4623         | 46.23        | 53.77       |       |
| 0.667                              |            | no          | 2664        | 26.64        | 73.36        |             |       |

|            |       |      |      |       |       |
|------------|-------|------|------|-------|-------|
|            | 0.7   | no   | 0    | 0     | 100   |
|            | 0.75  | no   | 0    | 0     | 100   |
|            | 0.8   | no   | 0    | 0     | 100   |
|            | 0.9   | no   | 0    | 0     | 100   |
|            | 1     | no   | 0    | 0     | 100   |
| <b>D/7</b> | 0.5   | no   | 0    | 0     | 100   |
|            | 0.6   | no   | 1    | 0.01  | 99.99 |
|            | 0.667 | no   | 133  | 1.33  | 98.67 |
|            | 0.7   | no   | 0    | 0     | 100   |
|            | 0.75  | no   | 0    | 0     | 100   |
|            | 0.8   | no   | 0    | 0     | 100   |
|            | 0.9   | no   | 0    | 0     | 100   |
|            | 1     | no   | 0    | 0     | 100   |
| <b>D/8</b> | 0.5   | no   | 0    | 0     | 100   |
|            | 0.6   | no   | 0    | 0     | 100   |
|            | 0.667 | no   | 0    | 0     | 100   |
|            | 0.7   | no   | 0    | 0     | 100   |
|            | 0.75  | no   | 0    | 0     | 100   |
|            | 0.8   | no   | 0    | 0     | 100   |
|            | 0.9   | no   | 0    | 0     | 100   |
|            | 1     | no   | 0    | 0     | 100   |
| <b>D/9</b> | 0.5   | no   | 0    | 0     | 100   |
|            | 0.6   | no   | 0    | 0     | 100   |
|            | 0.667 | no   | 0    | 0     | 100   |
|            | 0.7   | no   | 0    | 0     | 100   |
|            | 0.75  | no   | 0    | 0     | 100   |
|            | 0.8   | no   | 0    | 0     | 100   |
|            | 0.9   | no   | 0    | 0     | 100   |
|            | 1     | no   | 0    | 0     | 100   |
| <b>D/5</b> | 0.5   | no   | 8466 | 84.66 | 15.34 |
|            | 0.6   | no   | 0    | 0     | 100   |
|            | 0.667 | no   | 0    | 0     | 100   |
|            | 0.7   | no   | 0    | 0     | 100   |
|            | 0.75  | no   | 0    | 0     | 100   |
|            | 0.8   | no   | 0    | 0     | 100   |
|            | 0.9   | no   | 0    | 0     | 100   |
|            | 1     | no   | 0    | 0     | 100   |
| <b>D/6</b> | 0.5   | YES* | 9898 | 98.98 | 1.02  |
|            | 0.6   | no   | 0    | 0     | 100   |
|            | 0.667 | no   | 0    | 0     | 100   |
|            | 0.7   | no   | 0    | 0     | 100   |
|            | 0.75  | no   | 0    | 0     | 100   |
|            | 0.8   | no   | 0    | 0     | 100   |
|            | 0.9   | no   | 0    | 0     | 100   |
|            | 1     | no   | 0    | 0     | 100   |
| <b>D/7</b> | 0.5   | no   | 9061 | 90.61 | 9.39  |
|            | 0.6   | no   | 0    | 0     | 100   |
|            | 0.667 | no   | 0    | 0     | 100   |
|            | 0.7   | no   | 0    | 0     | 100   |
|            | 0.75  | no   | 0    | 0     | 100   |
|            | 0.8   | no   | 0    | 0     | 100   |
|            | 0.9   | no   | 0    | 0     | 100   |
|            | 1     | no   | 0    | 0     | 100   |
| <b>D/8</b> | 0.5   | no   | 1308 | 13.08 | 86.92 |
|            | 0.6   | no   | 0    | 0     | 100   |
|            | 0.667 | no   | 0    | 0     | 100   |
|            | 0.7   | no   | 0    | 0     | 100   |
|            | 0.75  | no   | 0    | 0     | 100   |
|            | 0.8   | no   | 0    | 0     | 100   |
|            | 0.9   | no   | 0    | 0     | 100   |
|            | 1     | no   | 0    | 0     | 100   |

Patronin  
KD,  
column 1

|           |       |       |      |       |       |       |
|-----------|-------|-------|------|-------|-------|-------|
| WT larvae | D/9   | 0.5   | no   | 2     | 0.02  | 99.98 |
|           |       | 0.6   | no   | 0     | 0     | 100   |
|           |       | 0.667 | no   | 0     | 0     | 100   |
|           |       | 0.7   | no   | 0     | 0     | 100   |
|           |       | 0.75  | no   | 0     | 0     | 100   |
|           |       | 0.8   | no   | 0     | 0     | 100   |
|           |       | 0.9   | no   | 0     | 0     | 100   |
|           |       | 1     | no   | 0     | 0     | 100   |
|           | D/5   | 0.5   | no   | 0     | 0     | 100   |
|           |       | 0.6   | no   | 0     | 0     | 100   |
|           |       | 0.667 | no   | 0     | 0     | 100   |
|           |       | 0.7   | no   | 0     | 0     | 100   |
|           |       | 0.75  | no   | 0     | 0     | 100   |
|           |       | 0.8   | no   | 0     | 0     | 100   |
|           |       | 0.9   | no   | 0     | 0     | 100   |
|           |       | 1     | no   | 0     | 0     | 100   |
|           | D/6   | 0.5   | no   | 0     | 0     | 100   |
|           |       | 0.6   | no   | 0     | 0     | 100   |
|           |       | 0.667 | no   | 0     | 0     | 100   |
|           |       | 0.7   | no   | 0     | 0     | 100   |
|           |       | 0.75  | no   | 0     | 0     | 100   |
| 0.8       |       | no    | 0    | 0     | 100   |       |
| 0.9       |       | no    | 0    | 0     | 100   |       |
| 1         |       | no    | 0    | 0     | 100   |       |
| D/7       | 0.5   | no    | 0    | 0     | 100   |       |
|           | 0.6   | no    | 0    | 0     | 100   |       |
|           | 0.667 | no    | 0    | 0     | 100   |       |
|           | 0.7   | no    | 0    | 0     | 100   |       |
|           | 0.75  | no    | 0    | 0     | 100   |       |
|           | 0.8   | no    | 4822 | 48.22 | 51.78 |       |
|           | 0.9   | no    | 0    | 0     | 100   |       |
|           | 1     | no    | 0    | 0     | 100   |       |
| D/8       | 0.5   | no    | 0    | 0     | 100   |       |
|           | 0.6   | no    | 0    | 0     | 100   |       |
|           | 0.667 | no    | 0    | 0     | 100   |       |
|           | 0.7   | no    | 0    | 0     | 100   |       |
|           | 0.75  | no    | 0    | 0     | 100   |       |
|           | 0.8   | YES*  | 9568 | 95.68 | 4.32  |       |
|           | 0.9   | no    | 0    | 0     | 100   |       |
|           | 1     | no    | 0    | 0     | 100   |       |
| D/9       | 0.5   | no    | 0    | 0     | 100   |       |
|           | 0.6   | no    | 0    | 0     | 100   |       |
|           | 0.667 | no    | 0    | 0     | 100   |       |
|           | 0.7   | no    | 0    | 0     | 100   |       |
|           | 0.75  | no    | 0    | 0     | 100   |       |
|           | 0.8   | no    | 9056 | 90.56 | 9.44  |       |
|           | 0.9   | no    | 0    | 0     | 100   |       |
|           | 1     | no    | 0    | 0     | 100   |       |



**Table S6. Summary of statistical modeling outcomes in embryos and larvae for cells with 2-11 denticles.** Models that meet the cutoff criteria are indicated in red.

| Genotype          | Model             |            | Model is acceptable ( $\geq 95\%$ pass) (YES/no) | # of simulations consistent with <i>in vivo</i> distribution ( $p \geq 0.05$ ) (out of 1,000) | Fraction that pass (% with $p \geq 0.05$ ) | Fraction that fail (% with $p < 0.05$ ) |     |
|-------------------|-------------------|------------|--------------------------------------------------|-----------------------------------------------------------------------------------------------|--------------------------------------------|-----------------------------------------|-----|
|                   | $\sigma =$        | $\alpha =$ |                                                  |                                                                                               |                                            |                                         |     |
| WT embryos, N = 2 | D/5               | 0.5        | no                                               | 0                                                                                             | 0                                          | 100                                     |     |
|                   |                   | 0.6        | no                                               | 0                                                                                             | 0                                          | 100                                     |     |
|                   |                   | 0.667      | no                                               | 104                                                                                           | 10.4                                       | 89.6                                    |     |
|                   |                   | 0.7        | no                                               | 6                                                                                             | 0.6                                        | 99.4                                    |     |
|                   |                   | 0.75       | no                                               | 0                                                                                             | 0                                          | 100                                     |     |
|                   |                   | 0.8        | no                                               | 0                                                                                             | 0                                          | 100                                     |     |
|                   |                   | 0.9        | no                                               | 0                                                                                             | 0                                          | 100                                     |     |
|                   |                   | 1          | no                                               | 0                                                                                             | 0                                          | 100                                     |     |
|                   | D/6               | 0.5        | no                                               | 0                                                                                             | 0                                          | 100                                     |     |
|                   |                   | 0.6        | no                                               | 0                                                                                             | 0                                          | 100                                     |     |
|                   |                   | 0.667      | no                                               | 942                                                                                           | 94.2                                       | 5.8                                     |     |
|                   |                   | 0.7        | no                                               | 505                                                                                           | 50.5                                       | 49.5                                    |     |
|                   |                   | 0.75       | no                                               | 1                                                                                             | 0.1                                        | 99.9                                    |     |
|                   |                   | 0.8        | no                                               | 0                                                                                             | 0                                          | 100                                     |     |
|                   |                   | 0.9        | no                                               | 0                                                                                             | 0                                          | 100                                     |     |
|                   |                   | 1          | no                                               | 0                                                                                             | 0                                          | 100                                     |     |
|                   | D/7               | 0.5        | no                                               | 0                                                                                             | 0                                          | 100                                     |     |
|                   |                   | 0.6        | no                                               | 0                                                                                             | 0                                          | 100                                     |     |
|                   |                   | 0.667      | YES                                              | 997                                                                                           | 99.7                                       | 0.3                                     |     |
|                   |                   | 0.7        | no                                               | 905                                                                                           | 90.5                                       | 9.5                                     |     |
|                   |                   | 0.75       | no                                               | 0                                                                                             | 0                                          | 100                                     |     |
|                   |                   | 0.8        | no                                               | 0                                                                                             | 0                                          | 100                                     |     |
|                   |                   | 0.9        | no                                               | 0                                                                                             | 0                                          | 100                                     |     |
|                   |                   | 1          | no                                               | 0                                                                                             | 0                                          | 100                                     |     |
|                   | D/8               | 0.5        | no                                               | 0                                                                                             | 0                                          | 100                                     |     |
|                   |                   | 0.6        | no                                               | 0                                                                                             | 0                                          | 100                                     |     |
|                   |                   | 0.667      | YES                                              | 988                                                                                           | 98.8                                       | 1.2                                     |     |
|                   |                   | 0.7        | no                                               | 928                                                                                           | 92.8                                       | 7.2                                     |     |
|                   |                   | 0.75       | no                                               | 0                                                                                             | 0                                          | 100                                     |     |
|                   |                   | 0.8        | no                                               | 0                                                                                             | 0                                          | 100                                     |     |
|                   |                   | 0.9        | no                                               | 0                                                                                             | 0                                          | 100                                     |     |
|                   |                   | 1          | no                                               | 0                                                                                             | 0                                          | 100                                     |     |
|                   | D/9               | 0.5        | no                                               | 0                                                                                             | 0                                          | 100                                     |     |
|                   |                   | 0.6        | no                                               | 0                                                                                             | 0                                          | 100                                     |     |
|                   |                   | 0.667      | no                                               | 911                                                                                           | 91.1                                       | 8.9                                     |     |
|                   |                   | 0.7        | no                                               | 886                                                                                           | 88.6                                       | 11.4                                    |     |
|                   |                   | 0.75       | no                                               | 0                                                                                             | 0                                          | 100                                     |     |
|                   |                   | 0.8        | no                                               | 0                                                                                             | 0                                          | 100                                     |     |
|                   |                   | 0.9        | no                                               | 0                                                                                             | 0                                          | 100                                     |     |
|                   |                   | 1          | no                                               | 0                                                                                             | 0                                          | 100                                     |     |
|                   | WT embryos, N = 3 | D/5        | 0.5                                              | no                                                                                            | 0                                          | 0                                       | 100 |
|                   |                   |            | 0.6                                              | no                                                                                            | 0                                          | 0                                       | 100 |
| 0.667             |                   |            | no                                               | 240                                                                                           | 24                                         | 76                                      |     |
| 0.7               |                   |            | no                                               | 890                                                                                           | 89                                         | 11                                      |     |
| 0.75              |                   |            | no                                               | 316                                                                                           | 31.6                                       | 68.4                                    |     |
| 0.8               |                   |            | no                                               | 0                                                                                             | 0                                          | 100                                     |     |
| 0.9               |                   |            | no                                               | 0                                                                                             | 0                                          | 100                                     |     |
| 1                 |                   |            | no                                               | 0                                                                                             | 0                                          | 100                                     |     |
| D/6               |                   | 0.5        | no                                               | 0                                                                                             | 0                                          | 100                                     |     |
|                   |                   | 0.6        | no                                               | 0                                                                                             | 0                                          | 100                                     |     |
|                   |                   | 0.667      | no                                               | 856                                                                                           | 85.6                                       | 14.4                                    |     |
|                   |                   | 0.7        | YES                                              | 1000                                                                                          | 100                                        | 0                                       |     |

|            |       |     |     |      |      |
|------------|-------|-----|-----|------|------|
|            | 0.75  | no  | 585 | 58.5 | 41.5 |
|            | 0.8   | no  | 0   | 0    | 100  |
|            | 0.9   | no  | 0   | 0    | 100  |
|            | 1     | no  | 0   | 0    | 100  |
| <b>D/7</b> | 0.5   | no  | 0   | 0    | 100  |
|            | 0.6   | no  | 0   | 0    | 100  |
|            | 0.667 | no  | 261 | 26.1 | 73.9 |
|            | 0.7   | no  | 833 | 83.3 | 16.7 |
|            | 0.75  | no  | 501 | 50.1 | 49.9 |
|            | 0.8   | no  | 0   | 0    | 100  |
|            | 0.9   | no  | 0   | 0    | 100  |
|            | 1     | no  | 0   | 0    | 100  |
| <b>D/8</b> | 0.5   | no  | 0   | 0    | 100  |
|            | 0.6   | no  | 0   | 0    | 100  |
|            | 0.667 | no  | 0   | 0    | 100  |
|            | 0.7   | no  | 83  | 8.3  | 91.7 |
|            | 0.75  | no  | 179 | 17.9 | 82.1 |
|            | 0.8   | no  | 0   | 0    | 100  |
|            | 0.9   | no  | 0   | 0    | 100  |
|            | 1     | no  | 0   | 0    | 100  |
| <b>D/9</b> | 0.5   | no  | 0   | 0    | 100  |
|            | 0.6   | no  | 0   | 0    | 100  |
|            | 0.667 | no  | 0   | 0    | 100  |
|            | 0.7   | no  | 0   | 0    | 100  |
|            | 0.75  | no  | 6   | 0.6  | 99.4 |
|            | 0.8   | no  | 0   | 0    | 100  |
|            | 0.9   | no  | 0   | 0    | 100  |
|            | 1     | no  | 0   | 0    | 100  |
| <b>D/5</b> | 0.5   | no  | 0   | 0    | 100  |
|            | 0.6   | no  | 50  | 5    | 95   |
|            | 0.667 | no  | 569 | 56.9 | 43.1 |
|            | 0.7   | no  | 830 | 83   | 17   |
|            | 0.75  | YES | 990 | 99   | 1    |
|            | 0.8   | no  | 931 | 93.1 | 6.9  |
|            | 0.9   | no  | 25  | 2.5  | 97.5 |
|            | 1     | no  | 0   | 0    | 100  |
| <b>D/6</b> | 0.5   | no  | 0   | 0    | 100  |
|            | 0.6   | no  | 1   | 0.1  | 99.9 |
|            | 0.667 | no  | 40  | 4    | 96   |
|            | 0.7   | no  | 130 | 13   | 87   |
|            | 0.75  | no  | 570 | 57   | 43   |
|            | 0.8   | no  | 381 | 38.1 | 61.9 |
|            | 0.9   | no  | 0   | 0    | 100  |
|            | 1     | no  | 0   | 0    | 100  |
| <b>D/7</b> | 0.5   | no  | 0   | 0    | 100  |
|            | 0.6   | no  | 0   | 0    | 100  |
|            | 0.667 | no  | 0   | 0    | 100  |
|            | 0.7   | no  | 1   | 0.1  | 99.9 |
|            | 0.75  | no  | 32  | 3.2  | 96.8 |
|            | 0.8   | no  | 8   | 0.8  | 99.2 |
|            | 0.9   | no  | 0   | 0    | 100  |
|            | 1     | no  | 0   | 0    | 100  |
| <b>D/8</b> | 0.5   | no  | 0   | 0    | 100  |
|            | 0.6   | no  | 0   | 0    | 100  |
|            | 0.667 | no  | 0   | 0    | 100  |
|            | 0.7   | no  | 0   | 0    | 100  |
|            | 0.75  | no  | 0   | 0    | 100  |
|            | 0.8   | no  | 0   | 0    | 100  |
|            | 0.9   | no  | 0   | 0    | 100  |
|            | 1     | no  | 0   | 0    | 100  |
| <b>D/9</b> | 0.5   | no  | 0   | 0    | 100  |

WT  
embryos,  
N = 4

|                                 |            |            |       |      |      |      |      |
|---------------------------------|------------|------------|-------|------|------|------|------|
|                                 | 0.6        | no         | 0     | 0    | 100  |      |      |
|                                 | 0.667      | no         | 0     | 0    | 100  |      |      |
|                                 | 0.7        | no         | 0     | 0    | 100  |      |      |
|                                 | 0.75       | no         | 0     | 0    | 100  |      |      |
|                                 | 0.8        | no         | 0     | 0    | 100  |      |      |
|                                 | 0.9        | no         | 0     | 0    | 100  |      |      |
|                                 | 1          | no         | 0     | 0    | 100  |      |      |
| <hr/>                           |            |            |       |      |      |      |      |
| <b>WT<br/>larvae,<br/>N = 2</b> | <b>D/5</b> | 0.5        | no    | 0    | 100  |      |      |
|                                 |            | 0.6        | no    | 23   | 2.3  | 97.7 |      |
|                                 |            | 0.667      | no    | 432  | 43.2 | 56.8 |      |
|                                 |            | 0.7        | no    | 734  | 73.4 | 26.6 |      |
|                                 |            | 0.75       | YES   | 956  | 95.6 | 4.4  |      |
|                                 |            | 0.8        | no    | 907  | 90.7 | 9.3  |      |
|                                 |            | 0.9        | no    | 197  | 19.7 | 80.3 |      |
|                                 |            | 1          | no    | 3    | 0.3  | 99.7 |      |
|                                 | <hr/>      |            |       |      |      |      |      |
|                                 |            | <b>D/6</b> | 0.5   | no   | 0    | 100  |      |
|                                 |            |            | 0.6   | no   | 26   | 2.6  | 97.4 |
|                                 |            |            | 0.667 | no   | 536  | 53.6 | 46.4 |
|                                 |            |            | 0.7   | no   | 879  | 87.9 | 12.1 |
|                                 |            |            | 0.75  | YES  | 996  | 99.6 | 0.4  |
|                                 |            |            | 0.8   | YES  | 978  | 97.8 | 2.2  |
|                                 |            |            | 0.9   | no   | 330  | 33   | 67   |
|                                 |            |            | 1     | no   | 2    | 0.2  | 99.8 |
|                                 | <hr/>      |            |       |      |      |      |      |
|                                 |            | <b>D/7</b> | 0.5   | no   | 0    | 0    | 100  |
|                                 |            |            | 0.6   | no   | 24   | 2.4  | 97.6 |
|                                 |            | 0.667      | no    | 658  | 65.8 | 34.2 |      |
|                                 |            | 0.7        | no    | 943  | 94.3 | 5.7  |      |
|                                 |            | 0.75       | YES   | 999  | 99.9 | 0.1  |      |
|                                 |            | 0.8        | YES   | 994  | 99.4 | 0.6  |      |
|                                 |            | 0.9        | no    | 382  | 38.2 | 61.8 |      |
|                                 |            | 1          | no    | 0    | 0    | 100  |      |
| <hr/>                           |            |            |       |      |      |      |      |
|                                 | <b>D/8</b> | 0.5        | no    | 0    | 0    | 100  |      |
|                                 |            | 0.6        | no    | 10   | 1    | 99   |      |
|                                 |            | 0.667      | no    | 692  | 69.2 | 30.8 |      |
|                                 |            | 0.7        | YES   | 959  | 95.9 | 4.1  |      |
|                                 |            | 0.75       | YES   | 1000 | 100  | 0    |      |
|                                 |            | 0.8        | YES   | 999  | 99.9 | 0.1  |      |
|                                 |            | 0.9        | no    | 415  | 41.5 | 58.5 |      |
|                                 |            | 1          | no    | 1    | 0.1  | 99.9 |      |
| <hr/>                           |            |            |       |      |      |      |      |
|                                 | <b>D/9</b> | 0.5        | no    | 0    | 0    | 100  |      |
|                                 |            | 0.6        | no    | 9    | 0.9  | 99.1 |      |
|                                 |            | 0.667      | no    | 731  | 73.1 | 26.9 |      |
|                                 |            | 0.7        | YES   | 975  | 97.5 | 2.5  |      |
|                                 |            | 0.75       | YES   | 1000 | 100  | 0    |      |
|                                 |            | 0.8        | YES   | 999  | 99.9 | 0.1  |      |
|                                 |            | 0.9        | no    | 457  | 45.7 | 54.3 |      |
|                                 |            | 1          | no    | 0    | 0    | 100  |      |
| <hr/>                           |            |            |       |      |      |      |      |
| <b>WT<br/>larvae,<br/>N = 3</b> | <b>D/5</b> | 0.5        | no    | 0    | 0    | 100  |      |
|                                 |            | 0.6        | no    | 0    | 0    | 100  |      |
|                                 |            | 0.667      | no    | 5    | 0.5  | 99.5 |      |
|                                 |            | 0.7        | no    | 121  | 12.1 | 87.9 |      |
|                                 |            | 0.75       | no    | 645  | 64.5 | 35.5 |      |
|                                 |            | 0.8        | no    | 332  | 33.2 | 66.8 |      |
|                                 |            | 0.9        | no    | 1    | 0.1  | 99.9 |      |
|                                 |            | 1          | no    | 0    | 0    | 100  |      |
|                                 | <hr/>      |            |       |      |      |      |      |
|                                 |            | <b>D/6</b> | 0.5   | no   | 0    | 0    | 100  |
|                                 |            |            | 0.6   | no   | 0    | 0    | 100  |
|                                 |            | 0.667      | no    | 21   | 2.1  | 97.9 |      |
|                                 |            | 0.7        | no    | 339  | 33.9 | 66.1 |      |
|                                 |            | 0.75       | YES   | 978  | 97.8 | 2.2  |      |

|            |       |     |      |      |      |
|------------|-------|-----|------|------|------|
|            | 0.8   | YES | 968  | 96.8 | 3.2  |
|            | 0.9   | no  | 43   | 4.3  | 95.7 |
|            | 1     | no  | 0    | 0    | 100  |
| <b>D/7</b> | 0.5   | no  | 0    | 0    | 100  |
|            | 0.6   | no  | 0    | 0    | 100  |
|            | 0.667 | no  | 32   | 3.2  | 96.8 |
|            | 0.7   | no  | 520  | 52   | 48   |
|            | 0.75  | YES | 997  | 99.7 | 0.3  |
|            | 0.8   | YES | 1000 | 100  | 0    |
|            | 0.9   | no  | 313  | 31.3 | 68.7 |
|            | 1     | no  | 0    | 0    | 100  |
| <b>D/8</b> | 0.5   | no  | 0    | 0    | 100  |
|            | 0.6   | no  | 0    | 0    | 100  |
|            | 0.667 | no  | 9    | 0.9  | 99.1 |
|            | 0.7   | no  | 569  | 56.9 | 43.1 |
|            | 0.75  | YES | 999  | 99.9 | 0.1  |
|            | 0.8   | YES | 1000 | 100  | 0    |
|            | 0.9   | no  | 587  | 58.7 | 41.3 |
|            | 1     | no  | 0    | 0    | 100  |
| <b>D/9</b> | 0.5   | no  | 0    | 0    | 100  |
|            | 0.6   | no  | 0    | 0    | 100  |
|            | 0.667 | no  | 2    | 0.2  | 99.8 |
|            | 0.7   | no  | 522  | 52.2 | 47.8 |
|            | 0.75  | YES | 1000 | 100  | 0    |
|            | 0.8   | YES | 1000 | 100  | 0    |
|            | 0.9   | no  | 716  | 71.6 | 28.4 |
|            | 1     | no  | 0    | 0    | 100  |
| <b>D/5</b> | 0.5   | no  | 0    | 0    | 100  |
|            | 0.6   | no  | 0    | 0    | 100  |
|            | 0.667 | no  | 0    | 0    | 100  |
|            | 0.7   | no  | 0    | 0    | 100  |
|            | 0.75  | no  | 36   | 3.6  | 96.4 |
|            | 0.8   | no  | 65   | 6.5  | 93.5 |
|            | 0.9   | no  | 0    | 0    | 100  |
|            | 1     | no  | 0    | 0    | 100  |
| <b>D/6</b> | 0.5   | no  | 0    | 0    | 100  |
|            | 0.6   | no  | 0    | 0    | 100  |
|            | 0.667 | no  | 0    | 0    | 100  |
|            | 0.7   | no  | 10   | 1    | 99   |
|            | 0.75  | no  | 721  | 72.1 | 27.9 |
|            | 0.8   | YES | 985  | 98.5 | 1.5  |
|            | 0.9   | no  | 81   | 8.1  | 91.9 |
|            | 1     | no  | 0    | 0    | 100  |
| <b>D/7</b> | 0.5   | no  | 0    | 0    | 100  |
|            | 0.6   | no  | 0    | 0    | 100  |
|            | 0.667 | no  | 0    | 0    | 100  |
|            | 0.7   | no  | 7    | 0.7  | 99.3 |
|            | 0.75  | no  | 938  | 93.8 | 6.2  |
|            | 0.8   | YES | 1000 | 100  | 0    |
|            | 0.9   | no  | 768  | 76.8 | 23.2 |
|            | 1     | no  | 0    | 0    | 100  |
| <b>D/8</b> | 0.5   | no  | 0    | 0    | 100  |
|            | 0.6   | no  | 0    | 0    | 100  |
|            | 0.667 | no  | 0    | 0    | 100  |
|            | 0.7   | no  | 2    | 0.2  | 99.8 |
|            | 0.75  | no  | 847  | 84.7 | 15.3 |
|            | 0.8   | YES | 1000 | 100  | 0    |
|            | 0.9   | YES | 984  | 98.4 | 1.6  |
|            | 1     | no  | 0    | 0    | 100  |
| <b>D/9</b> | 0.5   | no  | 0    | 0    | 100  |
|            | 0.6   | no  | 0    | 0    | 100  |

WT  
larvae,  
N = 4

|                        |       |       |      |      |      |      |
|------------------------|-------|-------|------|------|------|------|
|                        |       | 0.667 | no   | 0    | 0    | 100  |
|                        |       | 0.7   | no   | 0    | 0    | 100  |
|                        |       | 0.75  | no   | 677  | 67.7 | 32.3 |
|                        |       | 0.8   | YES  | 1000 | 100  | 0    |
|                        |       | 0.9   | YES  | 995  | 99.5 | 0.5  |
|                        |       | 1     | no   | 0    | 0    | 100  |
| <hr/>                  |       |       |      |      |      |      |
| WT<br>larvae,<br>N = 5 | D/5   | 0.5   | no   | 0    | 0    | 100  |
|                        |       | 0.6   | no   | 0    | 0    | 100  |
|                        |       | 0.667 | no   | 0    | 0    | 100  |
|                        |       | 0.7   | no   | 0    | 0    | 100  |
|                        |       | 0.75  | no   | 0    | 0    | 100  |
|                        |       | 0.8   | no   | 19   | 1.9  | 98.1 |
|                        |       | 0.9   | no   | 0    | 0    | 100  |
|                        |       | 1     | no   | 0    | 0    | 100  |
|                        | D/6   | 0.5   | no   | 0    | 0    | 100  |
|                        |       | 0.6   | no   | 0    | 0    | 100  |
|                        |       | 0.667 | no   | 0    | 0    | 100  |
|                        |       | 0.7   | no   | 0    | 0    | 100  |
|                        |       | 0.75  | no   | 29   | 2.9  | 97.1 |
|                        |       | 0.8   | no   | 661  | 66.1 | 33.9 |
|                        |       | 0.9   | no   | 477  | 47.7 | 52.3 |
|                        |       | 1     | no   | 0    | 0    | 100  |
|                        | D/7   | 0.5   | no   | 0    | 0    | 100  |
|                        |       | 0.6   | no   | 0    | 0    | 100  |
|                        |       | 0.667 | no   | 0    | 0    | 100  |
|                        |       | 0.7   | no   | 0    | 0    | 100  |
|                        |       | 0.75  | no   | 186  | 18.6 | 81.4 |
|                        |       | 0.8   | YES  | 969  | 96.9 | 3.1  |
|                        |       | 0.9   | YES  | 952  | 95.2 | 4.8  |
|                        |       | 1     | no   | 0    | 0    | 100  |
|                        | D/8   | 0.5   | no   | 0    | 0    | 100  |
|                        |       | 0.6   | no   | 0    | 0    | 100  |
|                        |       | 0.667 | no   | 0    | 0    | 100  |
|                        |       | 0.7   | no   | 0    | 0    | 100  |
| 0.75                   |       | no    | 417  | 41.7 | 58.3 |      |
| 0.8                    |       | YES   | 994  | 99.4 | 0.6  |      |
| 0.9                    |       | YES   | 1000 | 100  | 0    |      |
| 1                      |       | no    | 2    | 0.2  | 99.8 |      |
| D/9                    | 0.5   | no    | 0    | 0    | 100  |      |
|                        | 0.6   | no    | 0    | 0    | 100  |      |
|                        | 0.667 | no    | 0    | 0    | 100  |      |
|                        | 0.7   | no    | 0    | 0    | 100  |      |
|                        | 0.75  | no    | 414  | 41.4 | 58.6 |      |
|                        | 0.8   | YES   | 995  | 99.5 | 0.5  |      |
|                        | 0.9   | YES   | 1000 | 100  | 0    |      |
|                        | 1     | no    | 14   | 1.4  | 98.6 |      |
| <hr/>                  |       |       |      |      |      |      |
| WT<br>larvae,<br>N = 6 | D/5   | 0.5   | no   | 0    | 0    | 100  |
|                        |       | 0.6   | no   | 0    | 0    | 100  |
|                        |       | 0.667 | no   | 0    | 0    | 100  |
|                        |       | 0.7   | no   | 0    | 0    | 100  |
|                        |       | 0.75  | no   | 0    | 0    | 100  |
|                        |       | 0.8   | no   | 0    | 0    | 100  |
|                        |       | 0.9   | no   | 34   | 3.4  | 96.6 |
|                        |       | 1     | no   | 0    | 0    | 100  |
|                        |       | 1.1   | no   | 0    | 0    | 100  |
|                        |       | 1.2   | no   | 0    | 0    | 100  |
|                        |       | 1.3   | no   | 0    | 0    | 100  |
|                        |       | 1.4   | no   | 0    | 0    | 100  |
| 1.5                    | no    | 0     | 0    | 100  |      |      |
| 1.6                    | no    | 0     | 0    | 100  |      |      |

|            |       |     |      |      |      |
|------------|-------|-----|------|------|------|
|            | 1.7   | no  | 0    | 0    | 100  |
|            | 1.8   | no  | 0    | 0    | 100  |
|            | 1.9   | no  | 0    | 0    | 100  |
|            | 2     | no  | 0    | 0    | 100  |
|            | 0.5   | no  | 0    | 0    | 100  |
|            | 0.6   | no  | 0    | 0    | 100  |
|            | 0.667 | no  | 0    | 0    | 100  |
|            | 0.7   | no  | 0    | 0    | 100  |
|            | 0.75  | no  | 0    | 0    | 100  |
|            | 0.8   | no  | 18   | 1.8  | 98.2 |
|            | 0.9   | YES | 953  | 95.3 | 4.7  |
|            | 1     | no  | 139  | 13.9 | 86.1 |
| <b>D/6</b> | 1.1   | no  | 0    | 0    | 100  |
|            | 1.2   | no  | 0    | 0    | 100  |
|            | 1.3   | no  | 0    | 0    | 100  |
|            | 1.4   | no  | 0    | 0    | 100  |
|            | 1.5   | no  | 0    | 0    | 100  |
|            | 1.6   | no  | 0    | 0    | 100  |
|            | 1.7   | no  | 0    | 0    | 100  |
|            | 1.8   | no  | 0    | 0    | 100  |
|            | 1.9   | no  | 0    | 0    | 100  |
|            | 2     | no  | 0    | 0    | 100  |
|            | 0.5   | no  | 0    | 0    | 100  |
|            | 0.6   | no  | 0    | 0    | 100  |
|            | 0.667 | no  | 0    | 0    | 100  |
|            | 0.7   | no  | 0    | 0    | 100  |
|            | 0.75  | no  | 0    | 0    | 100  |
|            | 0.8   | no  | 109  | 10.9 | 89.1 |
|            | 0.9   | YES | 999  | 99.9 | 0.1  |
|            | 1     | no  | 665  | 66.5 | 33.5 |
| <b>D/7</b> | 1.1   | no  | 0    | 0    | 100  |
|            | 1.2   | no  | 0    | 0    | 100  |
|            | 1.3   | no  | 0    | 0    | 100  |
|            | 1.4   | no  | 0    | 0    | 100  |
|            | 1.5   | no  | 0    | 0    | 100  |
|            | 1.6   | no  | 0    | 0    | 100  |
|            | 1.7   | no  | 0    | 0    | 100  |
|            | 1.8   | no  | 0    | 0    | 100  |
|            | 1.9   | no  | 0    | 0    | 100  |
|            | 2     | no  | 0    | 0    | 100  |
|            | 0.5   | no  | 0    | 0    | 100  |
|            | 0.6   | no  | 0    | 0    | 100  |
|            | 0.667 | no  | 0    | 0    | 100  |
|            | 0.7   | no  | 0    | 0    | 100  |
|            | 0.75  | no  | 0    | 0    | 100  |
|            | 0.8   | no  | 244  | 24.4 | 75.6 |
|            | 0.9   | YES | 1000 | 100  | 0    |
|            | 1     | no  | 927  | 92.7 | 7.3  |
| <b>D/8</b> | 1.1   | no  | 0    | 0    | 100  |
|            | 1.2   | no  | 0    | 0    | 100  |
|            | 1.3   | no  | 0    | 0    | 100  |
|            | 1.4   | no  | 0    | 0    | 100  |
|            | 1.5   | no  | 0    | 0    | 100  |
|            | 1.6   | no  | 0    | 0    | 100  |
|            | 1.7   | no  | 0    | 0    | 100  |
|            | 1.8   | no  | 0    | 0    | 100  |
|            | 1.9   | no  | 0    | 0    | 100  |
|            | 2     | no  | 0    | 0    | 100  |
|            | 0.5   | no  | 0    | 0    | 100  |
| <b>D/9</b> | 0.6   | no  | 0    | 0    | 100  |
|            | 0.667 | no  | 0    | 0    | 100  |
|            | 0.7   | no  | 0    | 0    | 100  |

|            |       |     |      |      |      |
|------------|-------|-----|------|------|------|
|            | 0.75  | no  | 0    | 0    | 100  |
|            | 0.8   | no  | 281  | 28.1 | 71.9 |
|            | 0.9   | YES | 1000 | 100  | 0    |
|            | 1     | YES | 992  | 99.2 | 0.8  |
|            | 1.1   | no  | 0    | 0    | 100  |
|            | 1.2   | no  | 0    | 0    | 100  |
|            | 1.3   | no  | 0    | 0    | 100  |
|            | 1.4   | no  | 0    | 0    | 100  |
|            | 1.5   | no  | 0    | 0    | 100  |
|            | 1.6   | no  | 0    | 0    | 100  |
|            | 1.7   | no  | 0    | 0    | 100  |
|            | 1.8   | no  | 0    | 0    | 100  |
|            | 1.9   | no  | 0    | 0    | 100  |
|            | 2     | no  | 0    | 0    | 100  |
| <hr/>      |       |     |      |      |      |
|            | 0.5   | no  | 0    | 0    | 100  |
|            | 0.6   | no  | 0    | 0    | 100  |
|            | 0.667 | no  | 0    | 0    | 100  |
|            | 0.7   | no  | 4    | 0.4  | 99.6 |
|            | 0.75  | no  | 108  | 10.8 | 89.2 |
|            | 0.8   | no  | 600  | 60   | 40   |
|            | 0.9   | no  | 718  | 71.8 | 28.2 |
|            | 1     | no  | 70   | 7    | 93   |
| <b>D/5</b> | 1.1   | no  | 0    | 0    | 100  |
|            | 1.2   | no  | 0    | 0    | 100  |
|            | 1.3   | no  | 0    | 0    | 100  |
|            | 1.4   | no  | 0    | 0    | 100  |
|            | 1.5   | no  | 0    | 0    | 100  |
|            | 1.6   | no  | 0    | 0    | 100  |
|            | 1.7   | no  | 0    | 0    | 100  |
|            | 1.8   | no  | 0    | 0    | 100  |
|            | 1.9   | no  | 0    | 0    | 100  |
|            | 2     | no  | 0    | 0    | 100  |
| <hr/>      |       |     |      |      |      |
|            | 0.5   | no  | 0    | 0    | 100  |
|            | 0.6   | no  | 0    | 0    | 100  |
|            | 0.667 | no  | 3    | 0.3  | 99.7 |
|            | 0.7   | no  | 90   | 9    | 91   |
|            | 0.75  | no  | 628  | 62.8 | 37.2 |
|            | 0.8   | YES | 977  | 97.7 | 2.3  |
|            | 0.9   | YES | 1000 | 100  | 0    |
|            | 1     | no  | 805  | 80.5 | 19.5 |
| <b>D/6</b> | 1.1   | no  | 0    | 0    | 100  |
|            | 1.2   | no  | 0    | 0    | 100  |
|            | 1.3   | no  | 0    | 0    | 100  |
|            | 1.4   | no  | 0    | 0    | 100  |
|            | 1.5   | no  | 0    | 0    | 100  |
|            | 1.6   | no  | 0    | 0    | 100  |
|            | 1.7   | no  | 0    | 0    | 100  |
|            | 1.8   | no  | 0    | 0    | 100  |
|            | 1.9   | no  | 0    | 0    | 100  |
|            | 2     | no  | 0    | 0    | 100  |
| <hr/>      |       |     |      |      |      |
|            | 0.5   | no  | 0    | 0    | 100  |
|            | 0.6   | no  | 0    | 0    | 100  |
|            | 0.667 | no  | 8    | 0.8  | 99.2 |
|            | 0.7   | no  | 210  | 21   | 79   |
|            | 0.75  | no  | 873  | 87.3 | 12.7 |
|            | 0.8   | YES | 998  | 99.8 | 0.2  |
|            | 0.9   | YES | 1000 | 100  | 0    |
|            | 1     | YES | 970  | 97   | 3    |
|            | 1.1   | no  | 0    | 0    | 100  |
|            | 1.2   | no  | 0    | 0    | 100  |
|            | 1.3   | no  | 0    | 0    | 100  |

**WT  
larvae,  
N = 7**

|       |     |       |     |      |      |      |
|-------|-----|-------|-----|------|------|------|
|       |     | 1.4   | no  | 0    | 0    | 100  |
|       |     | 1.5   | no  | 0    | 0    | 100  |
|       |     | 1.6   | no  | 0    | 0    | 100  |
|       |     | 1.7   | no  | 0    | 0    | 100  |
|       |     | 1.8   | no  | 0    | 0    | 100  |
|       |     | 1.9   | no  | 0    | 0    | 100  |
|       |     | 2     | no  | 0    | 0    | 100  |
| <hr/> |     |       |     |      |      |      |
|       |     | 0.5   | no  | 0    | 0    | 100  |
|       |     | 0.6   | no  | 0    | 0    | 100  |
|       |     | 0.667 | no  | 7    | 0.7  | 99.3 |
|       |     | 0.7   | no  | 182  | 18.2 | 81.8 |
|       |     | 0.75  | no  | 905  | 90.5 | 9.5  |
|       |     | 0.8   | YES | 1000 | 100  | 0    |
|       |     | 0.9   | YES | 1000 | 100  | 0    |
|       |     | 1     | YES | 994  | 99.4 | 0.6  |
|       | D/8 | 1.1   | no  | 0    | 0    | 100  |
|       |     | 1.2   | no  | 0    | 0    | 100  |
|       |     | 1.3   | no  | 0    | 0    | 100  |
|       |     | 1.4   | no  | 0    | 0    | 100  |
|       |     | 1.5   | no  | 0    | 0    | 100  |
|       |     | 1.6   | no  | 0    | 0    | 100  |
|       |     | 1.7   | no  | 0    | 0    | 100  |
|       |     | 1.8   | no  | 0    | 0    | 100  |
|       |     | 1.9   | no  | 0    | 0    | 100  |
|       |     | 2     | no  | 0    | 0    | 100  |
| <hr/> |     |       |     |      |      |      |
|       |     | 0.5   | no  | 0    | 0    | 100  |
|       |     | 0.6   | no  | 0    | 0    | 100  |
|       |     | 0.667 | no  | 0    | 0    | 100  |
|       |     | 0.7   | no  | 84   | 8.4  | 91.6 |
|       |     | 0.75  | no  | 857  | 85.7 | 14.3 |
|       |     | 0.8   | YES | 999  | 99.9 | 0.1  |
|       |     | 0.9   | YES | 1000 | 100  | 0    |
|       |     | 1     | YES | 1000 | 100  | 0    |
|       | D/9 | 1.1   | no  | 0    | 0    | 100  |
|       |     | 1.2   | no  | 0    | 0    | 100  |
|       |     | 1.3   | no  | 0    | 0    | 100  |
|       |     | 1.4   | no  | 0    | 0    | 100  |
|       |     | 1.5   | no  | 0    | 0    | 100  |
|       |     | 1.6   | no  | 0    | 0    | 100  |
|       |     | 1.7   | no  | 0    | 0    | 100  |
|       |     | 1.8   | no  | 0    | 0    | 100  |
|       |     | 1.9   | no  | 0    | 0    | 100  |
|       |     | 2     | no  | 0    | 0    | 100  |
| <hr/> |     |       |     |      |      |      |
|       |     | 0.5   | no  | 0    | 0    | 100  |
|       |     | 0.6   | no  | 0    | 0    | 100  |
|       |     | 0.667 | no  | 0    | 0    | 100  |
|       |     | 0.7   | no  | 0    | 0    | 100  |
|       |     | 0.75  | no  | 0    | 0    | 100  |
|       |     | 0.8   | no  | 0    | 0    | 100  |
|       |     | 0.9   | no  | 19   | 1.9  | 98.1 |
|       |     | 1     | no  | 105  | 10.5 | 89.5 |
|       |     | 1     | no  | 10   | 0.1  | 99.9 |
|       | D/5 | 1.1   | no  | 0    | 0    | 100  |
|       |     | 1.2   | no  | 0    | 0    | 100  |
|       |     | 1.3   | no  | 0    | 0    | 100  |
|       |     | 1.4   | no  | 0    | 0    | 100  |
|       |     | 1.5   | no  | 0    | 0    | 100  |
|       |     | 1.6   | no  | 0    | 0    | 100  |
|       |     | 1.7   | no  | 0    | 0    | 100  |
|       |     | 1.8   | no  | 0    | 0    | 100  |
|       |     | 1.9   | no  | 0    | 0    | 100  |
|       |     | 2     | no  | 0    | 0    | 100  |

WT  
larvae,  
N = 8



|            |       |      |      |      |      |
|------------|-------|------|------|------|------|
| <b>D/6</b> | 0.5   | no   | 0    | 0    | 100  |
|            | 0.6   | no   | 0    | 0    | 100  |
|            | 0.667 | no   | 0    | 0    | 100  |
|            | 0.7   | no   | 0    | 0    | 100  |
|            | 0.75  | no   | 0    | 0    | 100  |
|            | 0.8   | no   | 2    | 0.2  | 99.8 |
|            | 0.9   | no   | 315  | 31.5 | 68.5 |
|            | 1     | no   | 901  | 90.1 | 9.9  |
|            | 1.1   | no   | 30   | 0.3  | 99.7 |
|            | 1.2   | no   | 0    | 0    | 100  |
|            | 1.3   | no   | 0    | 0    | 100  |
|            | 1.4   | no   | 0    | 0    | 100  |
|            | 1.5   | no   | 0    | 0    | 100  |
|            | 1.6   | no   | 0    | 0    | 100  |
|            | 1.7   | no   | 0    | 0    | 100  |
|            | 1.8   | no   | 0    | 0    | 100  |
|            | 1.9   | no   | 0    | 0    | 100  |
| 2          | no    | 0    | 0    | 100  |      |
| <b>D/7</b> | 0.5   | no   | 0    | 0    | 100  |
|            | 0.6   | no   | 0    | 0    | 100  |
|            | 0.667 | no   | 0    | 0    | 100  |
|            | 0.7   | no   | 0    | 0    | 100  |
|            | 0.75  | no   | 0    | 0    | 100  |
|            | 0.8   | no   | 10   | 1    | 99   |
|            | 0.9   | no   | 677  | 67.7 | 32.3 |
|            | 1     | YES  | 999  | 99.9 | 0.1  |
|            | 1.1   | no   | 200  | 2    | 98   |
|            | 1.2   | no   | 0    | 0    | 100  |
|            | 1.3   | no   | 0    | 0    | 100  |
|            | 1.4   | no   | 0    | 0    | 100  |
|            | 1.5   | no   | 0    | 0    | 100  |
|            | 1.6   | no   | 0    | 0    | 100  |
|            | 1.7   | no   | 0    | 0    | 100  |
|            | 1.8   | no   | 0    | 0    | 100  |
|            | 1.9   | no   | 0    | 0    | 100  |
| 2          | no    | 0    | 0    | 100  |      |
| <b>D/8</b> | 0.5   | no   | 0    | 0    | 100  |
|            | 0.6   | no   | 0    | 0    | 100  |
|            | 0.667 | no   | 0    | 0    | 100  |
|            | 0.7   | no   | 0    | 0    | 100  |
|            | 0.75  | no   | 0    | 0    | 100  |
|            | 0.8   | no   | 22   | 2.2  | 97.8 |
|            | 0.9   | no   | 846  | 84.6 | 15.4 |
|            | 1     | YES  | 1000 | 100  | 0    |
|            | 1.1   | no   | 590  | 5.9  | 94.1 |
|            | 1.2   | no   | 0    | 0    | 100  |
|            | 1.3   | no   | 0    | 0    | 100  |
|            | 1.4   | no   | 0    | 0    | 100  |
|            | 1.5   | no   | 0    | 0    | 100  |
|            | 1.6   | no   | 0    | 0    | 100  |
|            | 1.7   | no   | 0    | 0    | 100  |
|            | 1.8   | no   | 0    | 0    | 100  |
|            | 1.9   | no   | 0    | 0    | 100  |
| 2          | no    | 0    | 0    | 100  |      |
| <b>D/9</b> | 0.5   | no   | 0    | 0    | 100  |
|            | 0.6   | no   | 0    | 0    | 100  |
|            | 0.667 | no   | 0    | 0    | 100  |
|            | 0.7   | no   | 0    | 0    | 100  |
|            | 0.75  | no   | 0    | 0    | 100  |
|            | 0.8   | no   | 24   | 2.4  | 97.6 |
|            | 0.9   | no   | 921  | 92.1 | 7.9  |
| 1          | YES   | 1000 | 100  | 0    |      |

|                         |       |    |      |      |      |
|-------------------------|-------|----|------|------|------|
|                         | 1.1   | no | 1410 | 14.1 | 85.9 |
|                         | 1.2   | no | 0    | 0    | 100  |
|                         | 1.3   | no | 0    | 0    | 100  |
|                         | 1.4   | no | 0    | 0    | 100  |
|                         | 1.5   | no | 0    | 0    | 100  |
|                         | 1.6   | no | 0    | 0    | 100  |
|                         | 1.7   | no | 0    | 0    | 100  |
|                         | 1.8   | no | 0    | 0    | 100  |
|                         | 1.9   | no | 0    | 0    | 100  |
|                         | 2     | no | 0    | 0    | 100  |
| <hr/>                   |       |    |      |      |      |
|                         | 0.5   | no | 0    | 0    | 100  |
|                         | 0.6   | no | 0    | 0    | 100  |
|                         | 0.667 | no | 0    | 0    | 100  |
|                         | 0.7   | no | 0    | 0    | 100  |
|                         | 0.75  | no | 0    | 0    | 100  |
|                         | 0.8   | no | 0    | 0    | 100  |
|                         | 0.9   | no | 4    | 0.4  | 99.6 |
|                         | 1     | no | 195  | 19.5 | 80.5 |
| <b>D/5</b>              | 1.1   | no | 130  | 1.3  | 98.7 |
|                         | 1.2   | no | 0    | 0    | 100  |
|                         | 1.3   | no | 0    | 0    | 100  |
|                         | 1.4   | no | 0    | 0    | 100  |
|                         | 1.5   | no | 0    | 0    | 100  |
|                         | 1.6   | no | 0    | 0    | 100  |
|                         | 1.7   | no | 0    | 0    | 100  |
|                         | 1.8   | no | 0    | 0    | 100  |
|                         | 1.9   | no | 0    | 0    | 100  |
|                         | 2     | no | 0    | 0    | 100  |
| <hr/>                   |       |    |      |      |      |
|                         | 0.5   | no | 0    | 0    | 100  |
|                         | 0.6   | no | 0    | 0    | 100  |
|                         | 0.667 | no | 0    | 0    | 100  |
|                         | 0.7   | no | 0    | 0    | 100  |
|                         | 0.75  | no | 0    | 0    | 100  |
|                         | 0.8   | no | 0    | 0    | 100  |
|                         | 0.9   | no | 64   | 6.4  | 93.6 |
| <b>WT larvae, N = 9</b> | 1     | no | 752  | 75.2 | 24.8 |
| <b>D/6</b>              | 1.1   | no | 1680 | 16.8 | 83.2 |
|                         | 1.2   | no | 40   | 0.4  | 99.6 |
|                         | 1.3   | no | 0    | 0    | 100  |
|                         | 1.4   | no | 0    | 0    | 100  |
|                         | 1.5   | no | 0    | 0    | 100  |
|                         | 1.6   | no | 0    | 0    | 100  |
|                         | 1.7   | no | 0    | 0    | 100  |
|                         | 1.8   | no | 0    | 0    | 100  |
|                         | 1.9   | no | 0    | 0    | 100  |
|                         | 2     | no | 0    | 0    | 100  |
| <hr/>                   |       |    |      |      |      |
|                         | 0.5   | no | 0    | 0    | 100  |
|                         | 0.6   | no | 0    | 0    | 100  |
|                         | 0.667 | no | 0    | 0    | 100  |
|                         | 0.7   | no | 0    | 0    | 100  |
|                         | 0.75  | no | 0    | 0    | 100  |
|                         | 0.8   | no | 1    | 0.1  | 99.9 |
|                         | 0.9   | no | 172  | 17.2 | 82.8 |
| <b>D/7</b>              | 1     | no | 921  | 92.1 | 7.9  |
|                         | 1.1   | no | 5420 | 54.2 | 45.8 |
|                         | 1.2   | no | 410  | 4.1  | 95.9 |
|                         | 1.3   | no | 0    | 0    | 100  |
|                         | 1.4   | no | 0    | 0    | 100  |
|                         | 1.5   | no | 0    | 0    | 100  |
|                         | 1.6   | no | 0    | 0    | 100  |
|                         | 1.7   | no | 0    | 0    | 100  |

|                   |     |       |     |      |      |      |
|-------------------|-----|-------|-----|------|------|------|
|                   |     | 1.8   | no  | 0    | 0    | 100  |
|                   |     | 1.9   | no  | 0    | 0    | 100  |
|                   |     | 2     | no  | 0    | 0    | 100  |
|                   |     | 0.5   | no  | 0    | 0    | 100  |
|                   |     | 0.6   | no  | 0    | 0    | 100  |
|                   |     | 0.667 | no  | 0    | 0    | 100  |
|                   |     | 0.7   | no  | 0    | 0    | 100  |
|                   |     | 0.75  | no  | 0    | 0    | 100  |
|                   |     | 0.8   | no  | 0    | 0    | 100  |
|                   |     | 0.9   | no  | 200  | 20   | 80   |
|                   |     | 1     | YES | 965  | 96.5 | 3.5  |
|                   | D/8 | 1.1   | no  | 8720 | 87.2 | 12.8 |
|                   |     | 1.2   | no  | 2360 | 23.6 | 76.4 |
|                   |     | 1.3   | no  | 30   | 0.3  | 99.7 |
|                   |     | 1.4   | no  | 0    | 0    | 100  |
|                   |     | 1.5   | no  | 0    | 0    | 100  |
|                   |     | 1.6   | no  | 0    | 0    | 100  |
|                   |     | 1.7   | no  | 0    | 0    | 100  |
|                   |     | 1.8   | no  | 0    | 0    | 100  |
|                   |     | 1.9   | no  | 0    | 0    | 100  |
|                   |     | 2     | no  | 0    | 0    | 100  |
|                   |     | 0.5   | no  | 0    | 0    | 100  |
|                   |     | 0.6   | no  | 0    | 0    | 100  |
|                   |     | 0.667 | no  | 0    | 0    | 100  |
|                   |     | 0.7   | no  | 0    | 0    | 100  |
|                   |     | 0.75  | no  | 0    | 0    | 100  |
|                   |     | 0.8   | no  | 0    | 0    | 100  |
|                   |     | 0.9   | no  | 124  | 12.4 | 87.6 |
|                   |     | 1     | YES | 965  | 96.5 | 3.5  |
|                   | D/9 | 1.1   | YES | 9850 | 98.5 | 1.5  |
|                   |     | 1.2   | no  | 5450 | 54.5 | 45.5 |
|                   |     | 1.3   | no  | 80   | 0.8  | 99.2 |
|                   |     | 1.4   | no  | 0    | 0    | 100  |
|                   |     | 1.5   | no  | 0    | 0    | 100  |
|                   |     | 1.6   | no  | 0    | 0    | 100  |
|                   |     | 1.7   | no  | 0    | 0    | 100  |
|                   |     | 1.8   | no  | 0    | 0    | 100  |
|                   |     | 1.9   | no  | 0    | 0    | 100  |
|                   |     | 2     | no  | 0    | 0    | 100  |
|                   |     | 0.5   | no  | 0    | 0    | 100  |
|                   |     | 0.6   | no  | 0    | 0    | 100  |
|                   |     | 0.667 | no  | 0    | 0    | 100  |
|                   |     | 0.7   | no  | 0    | 0    | 100  |
|                   |     | 0.75  | no  | 0    | 0    | 100  |
|                   |     | 0.8   | no  | 0    | 0    | 100  |
|                   |     | 0.9   | no  | 2    | 0.2  | 99.8 |
|                   |     | 1     | no  | 13   | 1.3  | 98.7 |
|                   | D/5 | 1.1   | no  | 0    | 0    | 100  |
|                   |     | 1.2   | no  | 0    | 0    | 100  |
|                   |     | 1.3   | no  | 0    | 0    | 100  |
|                   |     | 1.4   | no  | 0    | 0    | 100  |
|                   |     | 1.5   | no  | 0    | 0    | 100  |
|                   |     | 1.6   | no  | 0    | 0    | 100  |
|                   |     | 1.7   | no  | 0    | 0    | 100  |
|                   |     | 1.8   | no  | 0    | 0    | 100  |
|                   |     | 1.9   | no  | 0    | 0    | 100  |
|                   |     | 2     | no  | 0    | 0    | 100  |
|                   |     | 0.5   | no  | 0    | 0    | 100  |
|                   | D/6 | 0.6   | no  | 0    | 0    | 100  |
|                   |     | 0.667 | no  | 0    | 0    | 100  |
|                   |     | 0.7   | no  | 0    | 0    | 100  |
| WT larvae, N = 10 |     |       |     |      |      |      |

|            |       |     |      |      |      |
|------------|-------|-----|------|------|------|
|            | 0.75  | no  | 0    | 0    | 100  |
|            | 0.8   | no  | 0    | 0    | 100  |
|            | 0.9   | no  | 50   | 5    | 95   |
|            | 1     | no  | 396  | 39.6 | 60.4 |
|            | 1.1   | no  | 20   | 0.2  | 99.8 |
|            | 1.2   | no  | 0    | 0    | 100  |
|            | 1.3   | no  | 0    | 0    | 100  |
|            | 1.4   | no  | 0    | 0    | 100  |
|            | 1.5   | no  | 0    | 0    | 100  |
|            | 1.6   | no  | 0    | 0    | 100  |
|            | 1.7   | no  | 0    | 0    | 100  |
|            | 1.8   | no  | 0    | 0    | 100  |
|            | 1.9   | no  | 0    | 0    | 100  |
|            | 2     | no  | 0    | 0    | 100  |
|            | <hr/> |     |      |      |      |
|            | 0.5   | no  | 0    | 0    | 100  |
|            | 0.6   | no  | 0    | 0    | 100  |
|            | 0.667 | no  | 0    | 0    | 100  |
|            | 0.7   | no  | 0    | 0    | 100  |
|            | 0.75  | no  | 0    | 0    | 100  |
|            | 0.8   | no  | 3    | 0.3  | 99.7 |
|            | 0.9   | no  | 293  | 29.3 | 70.7 |
|            | 1     | no  | 885  | 88.5 | 11.5 |
| <b>D/7</b> | 1.1   | no  | 570  | 5.7  | 94.3 |
|            | 1.2   | no  | 0    | 0    | 100  |
|            | 1.3   | no  | 0    | 0    | 100  |
|            | 1.4   | no  | 0    | 0    | 100  |
|            | 1.5   | no  | 0    | 0    | 100  |
|            | 1.6   | no  | 0    | 0    | 100  |
|            | 1.7   | no  | 0    | 0    | 100  |
|            | 1.8   | no  | 0    | 0    | 100  |
|            | 1.9   | no  | 0    | 0    | 100  |
|            | 2     | no  | 0    | 0    | 100  |
|            | <hr/> |     |      |      |      |
|            | 0.5   | no  | 0    | 0    | 100  |
|            | 0.6   | no  | 0    | 0    | 100  |
|            | 0.667 | no  | 0    | 0    | 100  |
|            | 0.7   | no  | 0    | 0    | 100  |
|            | 0.75  | no  | 0    | 0    | 100  |
|            | 0.8   | no  | 19   | 1.9  | 98.1 |
|            | 0.9   | no  | 644  | 64.4 | 35.6 |
|            | 1     | YES | 989  | 98.9 | 1.1  |
| <b>D/8</b> | 1.1   | no  | 1530 | 15.3 | 84.7 |
|            | 1.2   | no  | 10   | 0.1  | 99.9 |
|            | 1.3   | no  | 0    | 0    | 100  |
|            | 1.4   | no  | 0    | 0    | 100  |
|            | 1.5   | no  | 0    | 0    | 100  |
|            | 1.6   | no  | 0    | 0    | 100  |
|            | 1.7   | no  | 0    | 0    | 100  |
|            | 1.8   | no  | 0    | 0    | 100  |
|            | 1.9   | no  | 0    | 0    | 100  |
|            | 2     | no  | 0    | 0    | 100  |
|            | <hr/> |     |      |      |      |
|            | 0.5   | no  | 0    | 0    | 100  |
|            | 0.6   | no  | 0    | 0    | 100  |
|            | 0.667 | no  | 0    | 0    | 100  |
|            | 0.7   | no  | 0    | 0    | 100  |
|            | 0.75  | no  | 0    | 0    | 100  |
| <b>D/9</b> | 0.8   | no  | 54   | 5.4  | 94.6 |
|            | 0.9   | no  | 843  | 84.3 | 15.7 |
|            | 1     | YES | 998  | 99.8 | 0.2  |
|            | 1.1   | no  | 3300 | 33   | 67   |
|            | 1.2   | no  | 50   | 0.5  | 99.5 |
|            | 1.3   | no  | 0    | 0    | 100  |
|            | 1.4   | no  | 0    | 0    | 100  |

|       |            |       |     |      |      |      |
|-------|------------|-------|-----|------|------|------|
|       |            | 1.5   | no  | 0    | 0    | 100  |
|       |            | 1.6   | no  | 0    | 0    | 100  |
|       |            | 1.7   | no  | 0    | 0    | 100  |
|       |            | 1.8   | no  | 0    | 0    | 100  |
|       |            | 1.9   | no  | 0    | 0    | 100  |
|       |            | 2     | no  | 0    | 0    | 100  |
| <hr/> |            |       |     |      |      |      |
|       |            | 0.5   | no  | 0    | 0    | 100  |
|       |            | 0.6   | no  | 0    | 0    | 100  |
|       |            | 0.667 | no  | 0    | 0    | 100  |
|       |            | 0.7   | no  | 0    | 0    | 100  |
|       |            | 0.75  | no  | 1    | 0.1  | 99.9 |
|       |            | 0.8   | no  | 11   | 1.1  | 98.9 |
|       |            | 0.9   | no  | 111  | 11.1 | 88.9 |
|       |            | 1     | no  | 445  | 44.5 | 55.5 |
|       | <b>D/5</b> | 1.1   | no  | 5050 | 50.5 | 49.5 |
|       |            | 1.2   | no  | 2400 | 24   | 76   |
|       |            | 1.3   | no  | 620  | 6.2  | 93.8 |
|       |            | 1.4   | no  | 30   | 0.3  | 99.7 |
|       |            | 1.5   | no  | 0    | 0    | 100  |
|       |            | 1.6   | no  | 0    | 0    | 100  |
|       |            | 1.7   | no  | 0    | 0    | 100  |
|       |            | 1.8   | no  | 0    | 0    | 100  |
|       |            | 1.9   | no  | 0    | 0    | 100  |
|       |            | 2     | no  | 0    | 0    | 100  |
| <hr/> |            |       |     |      |      |      |
|       |            | 0.5   | no  | 0    | 0    | 100  |
|       |            | 0.6   | no  | 0    | 0    | 100  |
|       |            | 0.667 | no  | 1    | 0.1  | 99.9 |
|       |            | 0.7   | no  | 1    | 0.1  | 99.9 |
|       |            | 0.75  | no  | 24   | 2.4  | 97.6 |
|       |            | 0.8   | no  | 60   | 6    | 94   |
|       |            | 0.9   | no  | 428  | 42.8 | 57.2 |
|       |            | 1     | no  | 868  | 86.8 | 13.2 |
|       | <b>D/6</b> | 1.1   | no  | 9340 | 93.4 | 6.6  |
|       |            | 1.2   | no  | 7090 | 70.9 | 29.1 |
|       |            | 1.3   | no  | 2980 | 29.8 | 70.2 |
|       |            | 1.4   | no  | 530  | 5.3  | 94.7 |
|       |            | 1.5   | no  | 30   | 0.3  | 99.7 |
|       |            | 1.6   | no  | 0    | 0    | 100  |
|       |            | 1.7   | no  | 0    | 0    | 100  |
|       |            | 1.8   | no  | 0    | 0    | 100  |
|       |            | 1.9   | no  | 0    | 0    | 100  |
|       |            | 2     | no  | 0    | 0    | 100  |
| <hr/> |            |       |     |      |      |      |
|       |            | 0.5   | no  | 0    | 0    | 100  |
|       |            | 0.6   | no  | 0    | 0    | 100  |
|       |            | 0.667 | no  | 3    | 0.3  | 99.7 |
|       |            | 0.7   | no  | 10   | 1    | 99   |
|       |            | 0.75  | no  | 44   | 4.4  | 95.6 |
|       |            | 0.8   | no  | 185  | 18.5 | 81.5 |
|       |            | 0.9   | no  | 654  | 65.4 | 34.6 |
|       |            | 1     | YES | 952  | 95.2 | 4.8  |
|       | <b>D/7</b> | 1.1   | YES | 9990 | 99.9 | 0.1  |
|       |            | 1.2   | no  | 9360 | 93.6 | 6.4  |
|       |            | 1.3   | no  | 5630 | 56.3 | 43.7 |
|       |            | 1.4   | no  | 1630 | 16.3 | 83.7 |
|       |            | 1.5   | no  | 70   | 0.7  | 99.3 |
|       |            | 1.6   | no  | 0    | 0    | 100  |
|       |            | 1.7   | no  | 0    | 0    | 100  |
|       |            | 1.8   | no  | 0    | 0    | 100  |
|       |            | 1.9   | no  | 0    | 0    | 100  |
|       |            | 2     | no  | 0    | 0    | 100  |
| <hr/> |            |       |     |      |      |      |
|       | <b>D/8</b> | 0.5   | no  | 0    | 0    | 100  |

**WT  
larvae,  
N = 11**

|       |       |     |       |      |      |
|-------|-------|-----|-------|------|------|
|       | 0.6   | no  | 0     | 0    | 100  |
|       | 0.667 | no  | 2     | 0.2  | 99.8 |
|       | 0.7   | no  | 10    | 1    | 99   |
|       | 0.75  | no  | 60    | 6    | 94   |
|       | 0.8   | no  | 245   | 24.5 | 75.5 |
|       | 0.9   | no  | 791   | 79.1 | 20.9 |
|       | 1     | YES | 986   | 98.6 | 1.4  |
|       | 1.1   | YES | 10000 | 100  | 0    |
|       | 1.2   | YES | 9850  | 98.5 | 1.5  |
|       | 1.3   | no  | 7480  | 74.8 | 25.2 |
|       | 1.4   | no  | 1940  | 19.4 | 80.6 |
|       | 1.5   | no  | 60    | 0.6  | 99.4 |
|       | 1.6   | no  | 0     | 0    | 100  |
|       | 1.7   | no  | 0     | 0    | 100  |
|       | 1.8   | no  | 0     | 0    | 100  |
|       | 1.9   | no  | 0     | 0    | 100  |
|       | 2     | no  | 0     | 0    | 100  |
| <hr/> |       |     |       |      |      |
|       | 0.5   | no  | 0     | 0    | 100  |
|       | 0.6   | no  | 0     | 0    | 100  |
|       | 0.667 | no  | 0     | 0    | 100  |
|       | 0.7   | no  | 4     | 0.4  | 99.6 |
|       | 0.75  | no  | 66    | 6.6  | 93.4 |
|       | 0.8   | no  | 283   | 28.3 | 71.7 |
|       | 0.9   | no  | 859   | 85.9 | 14.1 |
|       | 1     | YES | 998   | 99.8 | 0.2  |
|       | 1.1   | YES | 10000 | 100  | 0    |
| D/9   | 1.2   | YES | 9860  | 98.6 | 1.4  |
|       | 1.3   | no  | 7710  | 77.1 | 22.9 |
|       | 1.4   | no  | 2100  | 21   | 79   |
|       | 1.5   | no  | 20    | 0.2  | 99.8 |
|       | 1.6   | no  | 0     | 0    | 100  |
|       | 1.7   | no  | 0     | 0    | 100  |
|       | 1.8   | no  | 0     | 0    | 100  |
|       | 1.9   | no  | 0     | 0    | 100  |
|       | 2     | no  | 0     | 0    | 100  |
